# Supplementary material for: Hydride- and halide-substituted Au 9 (PH 3 ) 8 3+ nanoclusters: similar absorption spectra disguise distinct geometries and electronic structures
Source: Royal Society of Chemistry journal article supplement (doi:10.1039/d1cp02761a), 2021-01-01
Supplement: d1cp02761a1.pdf [file d1cp02761a1.pdf]

**Supporting Information:**

**Hydride- and Halide-Substituted  $\text{Au}_9(\text{PH}_3)_8^{3+}$  Nanoclusters: Similar  
Absorption Spectra Disguise Distinct Geometries and Electronic Structures**

Yavuz S. Ceylan, Rebecca L. M. Giesecking\*

*Department of Chemistry, Brandeis University*

*415 South Street, Waltham, Massachusetts 02453*

\* Corresponding author: [giesecking@brandeis.edu](mailto:giesecking@brandeis.edu); (781)-736-2511

**Au<sub>9</sub>(PH<sub>3</sub>)<sub>8</sub><sup>3+</sup> (D<sub>2h</sub> and D<sub>4d</sub> symmetries)****Table S1.** Excited states of Au<sub>9</sub>(PH<sub>3</sub>)<sub>8</sub><sup>3+</sup> (D<sub>2h</sub> symmetry). All excited states between 2.0 and 3.9 eV with oscillator strengths larger than 0.02 are listed.

| Energy (eV) | f      | Superatomic character (%) | Weight (%) | Transition |        |
|-------------|--------|---------------------------|------------|------------|--------|
| 2.52        | 0.0210 | 99.19                     | 51.20      | HOMO       | LUMO   |
|             |        |                           | 47.48      | HOMO       | LUMO+2 |
| 2.63        | 0.1097 | 80.22                     | 40.12      | HOMO-1     | LUMO   |
|             |        |                           | 39.65      | HOMO       | LUMO+2 |
|             |        |                           | 18.64      | HOMO-2     | LUMO   |
| 3.17        | 0.2754 | 15.15                     | 73.32      | HOMO-2     | LUMO   |
| 3.51        | 0.0207 | 18.13                     | 15.64      | HOMO       | LUMO+5 |
| 3.57        | 0.0810 | 1.15                      | 89.50      | HOMO-5     | LUMO+1 |
| 3.62        | 0.0250 | 0.84                      | 89.33      | HOMO-6     | LUMO   |
| 3.87        | 0.7635 | 69.8                      | 48.39      | HOMO       | LUMO+2 |
|             |        |                           | 17.32      | HOMO-1     | LUMO+1 |
|             |        |                           | 16.66      | HOMO-2     | LUMO+2 |

**Table S2.** Excited states of Au<sub>9</sub>(PH<sub>3</sub>)<sub>8</sub><sup>3+</sup> (D<sub>4d</sub> symmetry). All excited states between 2.0 and 3.9 eV with oscillator strengths larger than 0.02 are listed.

| Energy (eV) | f      | Superatomic character (%) | Weight (%) | Transition |        |
|-------------|--------|---------------------------|------------|------------|--------|
| 2.87        | 0.176  | 95.75                     | 89.03      | HOMO       | LUMO+1 |
| 3.57        | 0.0911 | 60.86                     | 57.84      | HOMO       | LUMO+3 |
|             |        |                           | 19.87      | HOMO-2     | LUMO+1 |
|             |        |                           | 16.85      | HOMO-2     | LUMO   |
| 3.82        | 0.1751 | 11.72                     | 73.75      | HOMO-2     | LUMO+1 |
|             |        |                           | 9.99       | HOMO-9     | LUMO   |
| 3.87        | 0.0218 | 50.1                      | 49.16      | HOMO       | LUMO+4 |
|             |        |                           | 24.98      | HOMO-7     | LUMO   |

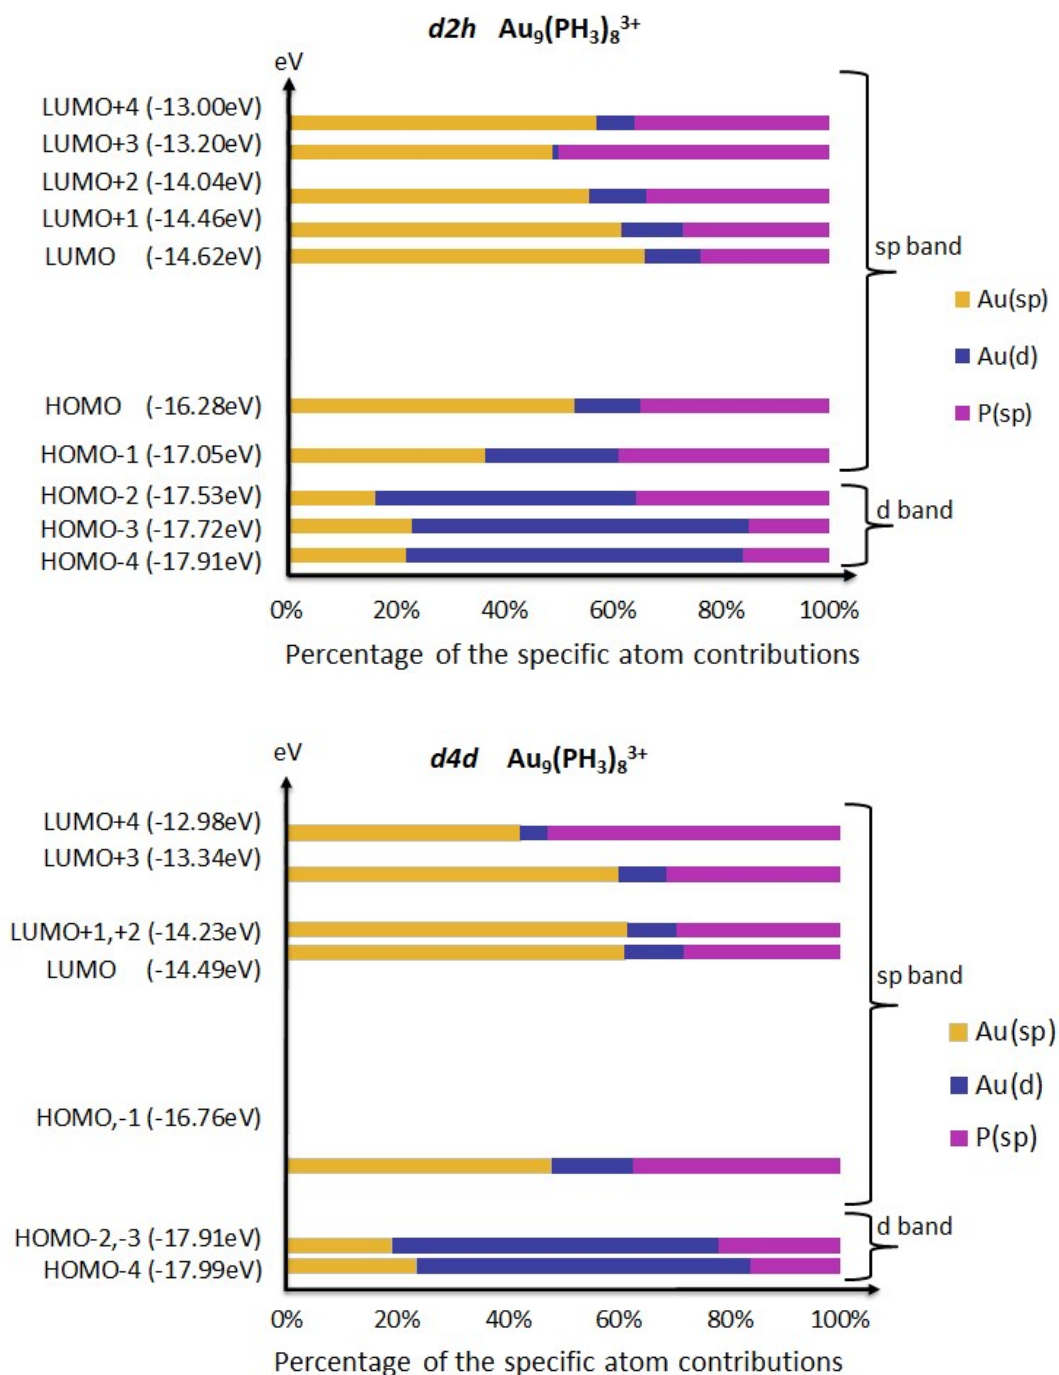

**Figure S1.** Kohn–Sham orbital energy diagram for the (top)  $D_{2h}$  and (bottom)  $D_{4d}$  symmetries of  $\text{Au}_9(\text{PH}_3)_8^{3+}$ . The horizontal colored bar for each Kohn–Sham orbital indicates the percent contributions of the atomic orbitals of Au (sp) in yellow, Au (d) in blue, and P (sp) in violet. The y axis shows the orbital energy.

**Au<sub>9</sub>(PPh<sub>3</sub>)<sub>8</sub><sup>3+</sup> (D<sub>2h</sub> and D<sub>4d</sub> like symmetries)****Table S3.** Excited states of Au<sub>9</sub>(PPh<sub>3</sub>)<sub>8</sub><sup>3+</sup> (D<sub>2h</sub> like symmetry). All excited states with oscillator strengths larger than 0.02 are listed.

| Energy (eV) | f      | Superatomic character (%) | Weight (%) | Transition |         |
|-------------|--------|---------------------------|------------|------------|---------|
| 1.54        | 0.0296 | 99.94                     | 98.92%     | HOMO       | LUMO    |
| 2.21        | 0.1261 | 94.37                     | 60.01%     | HOMO       | LUMO+2  |
|             |        |                           | 28.33%     | HOMO-1     | LUMO    |
| 2.60        | 0.1078 | 50.04                     | 48.10%     | HOMO-2     | LUMO    |
|             |        |                           | 30.98%     | HOMO       | LUMO+11 |
| 2.60        | 0.0612 | 72.85                     | 59.25%     | HOMO       | LUMO+11 |
|             |        |                           | 26.11%     | HOMO-2     | LUMO    |
| 2.68        | 0.0328 | 96.81                     | 92.48%     | HOMO       | LUMO+15 |
| 2.72        | 0.0781 | 98.66                     | 37.73%     | HOMO-1     | LUMO+2  |
|             |        |                           | 30.56%     | HOMO       | LUMO+16 |
|             |        |                           | 15.13%     | HOMO       | LUMO+17 |
| 2.77        | 0.1465 | 98.08                     | 42.27%     | HOMO       | LUMO+16 |
|             |        |                           | 29.04%     | HOMO-1     | LUMO+2  |
| 3.01        | 0.0417 | 5.16                      | 77.22%     | HOMO-3     | LUMO+1  |
|             |        |                           | 12.26%     | HOMO-7     | LUMO    |
| 3.04        | 0.0276 | 4.23                      | 75.34%     | HOMO-7     | LUMO    |
| 3.13        | 0.1547 | 28.54                     | 66.41%     | HOMO-2     | LUMO+2  |
| 3.13        | 0.0506 | 71.62                     | 38.72%     | HOMO       | LUMO+35 |
|             |        |                           | 20.47%     | HOMO-1     | LUMO+8  |
|             |        |                           | 11.30%     | HOMO-5     | LUMO+1  |
| 3.14        | 0.0511 | 84.92                     | 34.18%     | HOMO       | LUMO+34 |
|             |        |                           | 15.97%     | HOMO       | LUMO+35 |
|             |        |                           | 13.64%     | HOMO-1     | LUMO+8  |
| 3.17        | 0.0266 | 68.85                     | 48.10%     | HOMO-1     | LUMO+10 |
|             |        |                           | 15.62%     | HOMO-13    | LUMO    |
| 3.21        | 0.0212 | 93.96                     | 66.74%     | HOMO       | LUMO+39 |
|             |        |                           | 20.26%     | HOMO-1     | LUMO+12 |
| 3.23        | 0.0214 | 26.07                     | 41.86%     | HOMO-9     | LUMO+1  |
|             |        |                           | 15.32%     | HOMO-10    | LUMO+1  |
| 3.25        | 0.0434 | 52.43                     | 26.39%     | HOMO-1     | LUMO+14 |
|             |        |                           | 17.22%     | HOMO-11    | LUMO+1  |
|             |        |                           | 14.48%     | HOMO-9     | LUMO+1  |
| 3.28        | 0.0279 | 73.41                     | 52.14%     | HOMO       | LUMO+43 |
|             |        |                           | 20.03%     | HOMO-12    | LUMO+1  |
|             |        |                           | 17.55%     | HOMO-1     | LUMO+15 |

**Table S4.** Excited states of  $\text{Au}_9(\text{PPh}_3)_8^{3+}$  ( $D_{4d}$  like symmetry). All excited states with oscillator strengths larger than 0.02 are listed.

| Energy (eV) | f      | Superatomic character (%) | Weight (%) | Transition |         |
|-------------|--------|---------------------------|------------|------------|---------|
| 2.12        | 0.0448 | 99.78                     | 90.59%     | HOMO       | LUMO+1  |
| 2.23        | 0.0276 | 99.72                     | 82.36%     | HOMO       | LUMO+2  |
|             |        |                           | 13.15%     | HOMO-1     | LUMO+1  |
| 2.35        | 0.1057 | 98.84                     | 80.46%     | HOMO-1     | LUMO+1  |
|             |        |                           | 10.83%     | HOMO       | LUMO+2  |
| 2.44        | 0.1106 | 98.28                     | 86.55%     | HOMO-1     | LUMO+2  |
| 2.67        | 0.0386 | 65.47                     | 55.72%     | HOMO       | LUMO+6  |
|             |        |                           | 33.90%     | HOMO-2     | LUMO    |
| 2.76        | 0.0343 | 94.84                     | 77.90%     | HOMO       | LUMO+8  |
| 2.82        | 0.0721 | 29.5                      | 67.61%     | HOMO-3     | LUMO    |
|             |        |                           | 13.05%     | HOMO       | LUMO+11 |
| 2.86        | 0.0281 | 87.84                     | 61.16%     | HOMO-1     | LUMO+6  |
|             |        |                           | 20.51%     | HOMO       | LUMO+12 |
| 2.94        | 0.0242 | 88.19                     | 71.30%     | HOMO-1     | LUMO+8  |
| 3.01        | 0.0211 | 77.2                      | 53.92%     | HOMO       | LUMO+19 |
|             |        |                           | 14.59%     | HOMO-6     | LUMO    |
| 3.03        | 0.0559 | 25.87                     | 61.60%     | HOMO-2     | LUMO+1  |
| 3.06        | 0.0369 | 90.79                     | 53.15%     | HOMO-1     | LUMO+13 |
|             |        |                           | 15.45%     | HOMO-1     | LUMO+12 |
| 3.14        | 0.0263 | 26.38                     | 32.60%     | HOMO-9     | LUMO    |
|             |        |                           | 20.89%     | HOMO-3     | LUMO+1  |
|             |        |                           | 14.96%     | HOMO       | LUMO+26 |
| 3.15        | 0.0309 | 76.87                     | 70.53%     | HOMO-1     | LUMO+17 |
|             |        |                           | 18.11%     | HOMO-10    | LUMO    |
| 3.17        | 0.0623 | 22.66                     | 53.56%     | HOMO-3     | LUMO+1  |
| 3.18        | 0.0209 | 95.32                     | 46.79%     | HOMO       | LUMO+28 |
|             |        |                           | 26.58%     | HOMO-1     | LUMO+18 |
|             |        |                           | 13.18%     | HOMO       | LUMO+27 |
| 3.19        | 0.0599 | 88.89                     | 60.54%     | HOMO       | LUMO+29 |
| 3.25        | 0.0268 | 20.31                     | 37.17%     | HOMO-3     | LUMO+2  |
|             |        |                           | 20.39%     | HOMO-18    | LUMO    |
|             |        |                           | 14.21%     | HOMO-4     | LUMO+1  |
| 3.27        | 0.0323 | 53.17                     | 23.13%     | HOMO-3     | LUMO+2  |
|             |        |                           | 21.32%     | HOMO       | LUMO+32 |
|             |        |                           | 17.29%     | HOMO-1     | LUMO+21 |
|             |        |                           | 13.84%     | HOMO-19    | LUMO    |
| 3.30        | 0.0369 | 71.25                     | 40.63%     | HOMO-1     | LUMO+24 |
|             |        |                           | 23.81%     | HOMO-5     | LUMO+1  |
|             |        |                           | 22.11%     | HOMO-1     | LUMO+23 |
| 3.30        | 0.0594 | 32.3                      | 51.15%     | HOMO-5     | LUMO+1  |

|      |        |       |        |        |         |
|------|--------|-------|--------|--------|---------|
|      |        |       | 22.04% | HOMO-1 | LUMO+24 |
| 3.35 | 0.0294 | 79.49 | 60.20% | HOMO   | LUMO+36 |
|      |        |       | 15.99% | HOMO-6 | LUMO+1  |
| 3.36 | 0.0382 | 28.47 | 56.61% | HOMO-4 | LUMO+2  |
|      |        |       | 19.61% | HOMO-1 | LUMO+27 |

### **Au<sub>9</sub>(PH<sub>3</sub>)<sub>8</sub>H<sup>2+</sup>**

**Table S5.** Relative energies at the revTPSS/TZP level of Au<sub>9</sub>(PH<sub>3</sub>)<sub>8</sub>H<sup>2+</sup>. d2h # and d4d # represent different optimized geometries derived from different starting positions of the hydride on the unsubstituted D<sub>2h</sub> and D<sub>4d</sub> symmetries of Au<sub>9</sub>(PH<sub>3</sub>)<sub>8</sub><sup>3+</sup>. The structure indicated in bold (**d2h 2**) is the most stable structure, described in the manuscript.

|              | Δ(kcal/mol) |
|--------------|-------------|
| d2h 1        | 9.18        |
| <b>d2h 2</b> | <b>0.00</b> |
| d2h 3        | 11.93       |
| d2h 4        | 8.61        |
| d4d 1        | 6.75        |
| d4d 2        | 7.81        |

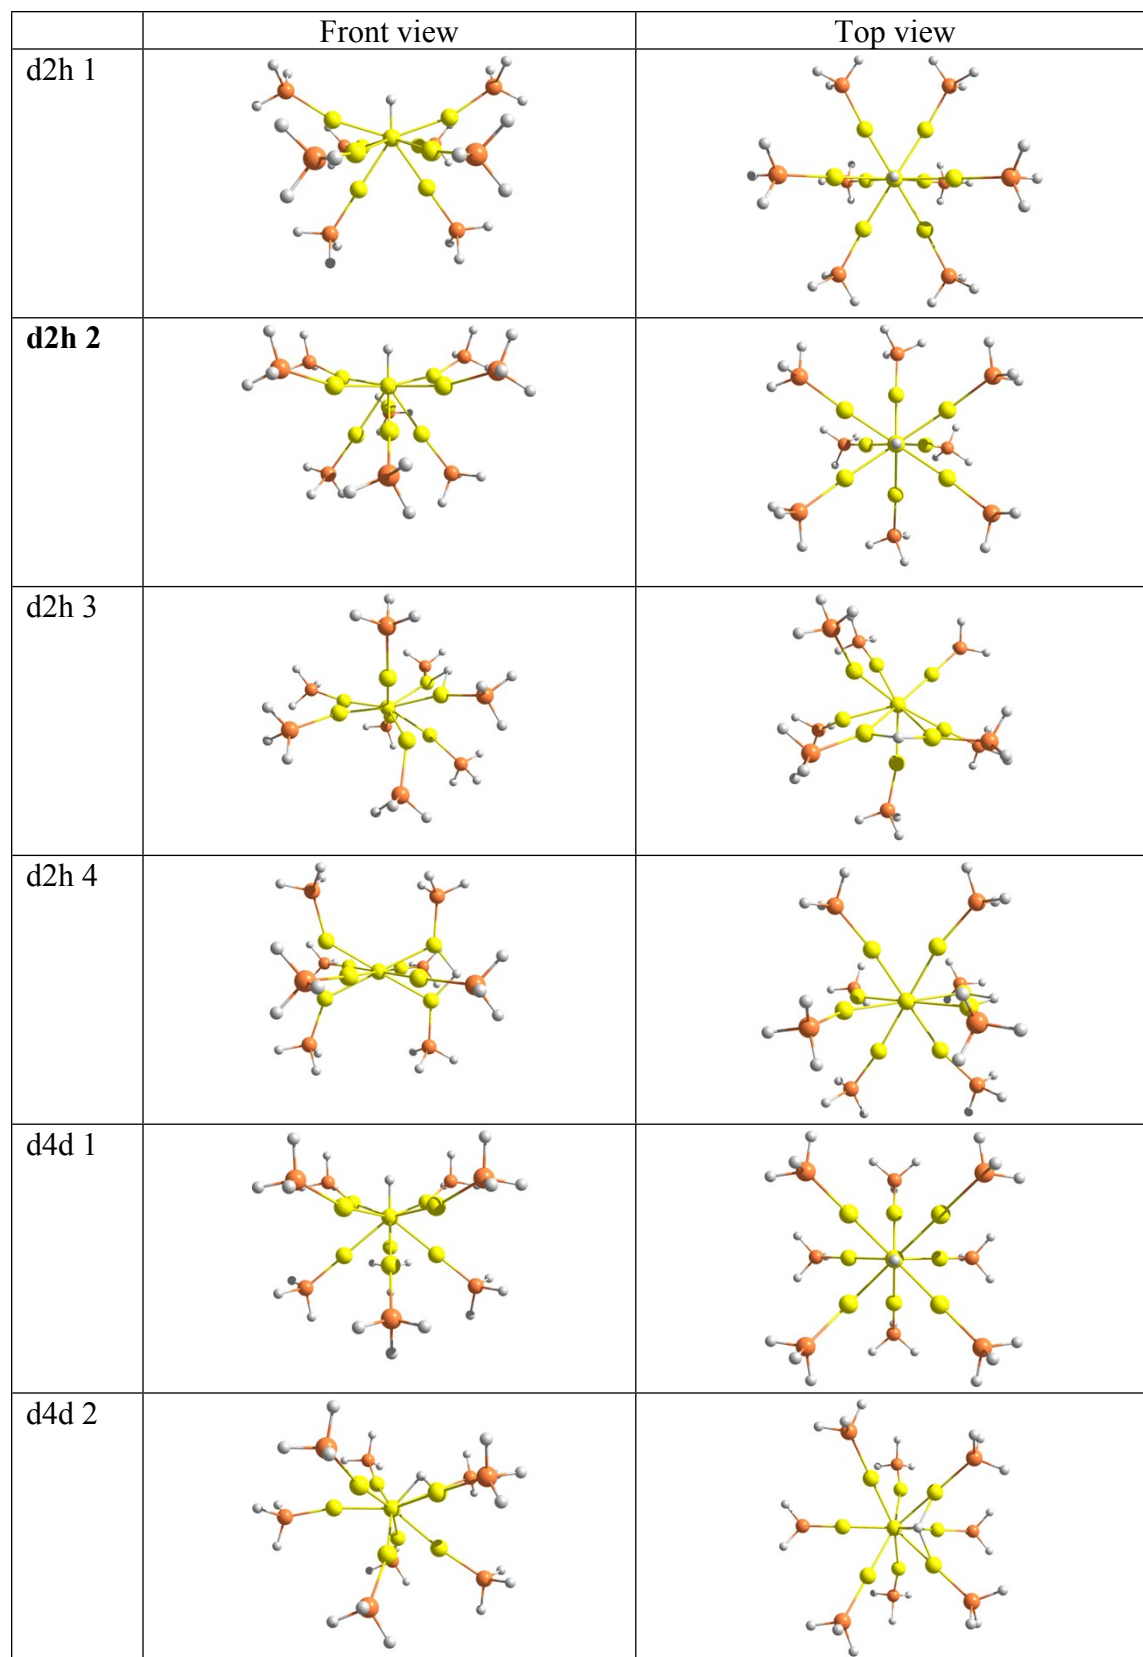

**Figure S2.** Optimized structures of the  $\text{Au}_9(\text{PH}_3)_8\text{H}^{2+}$  at revTPSS/TZP level of theory

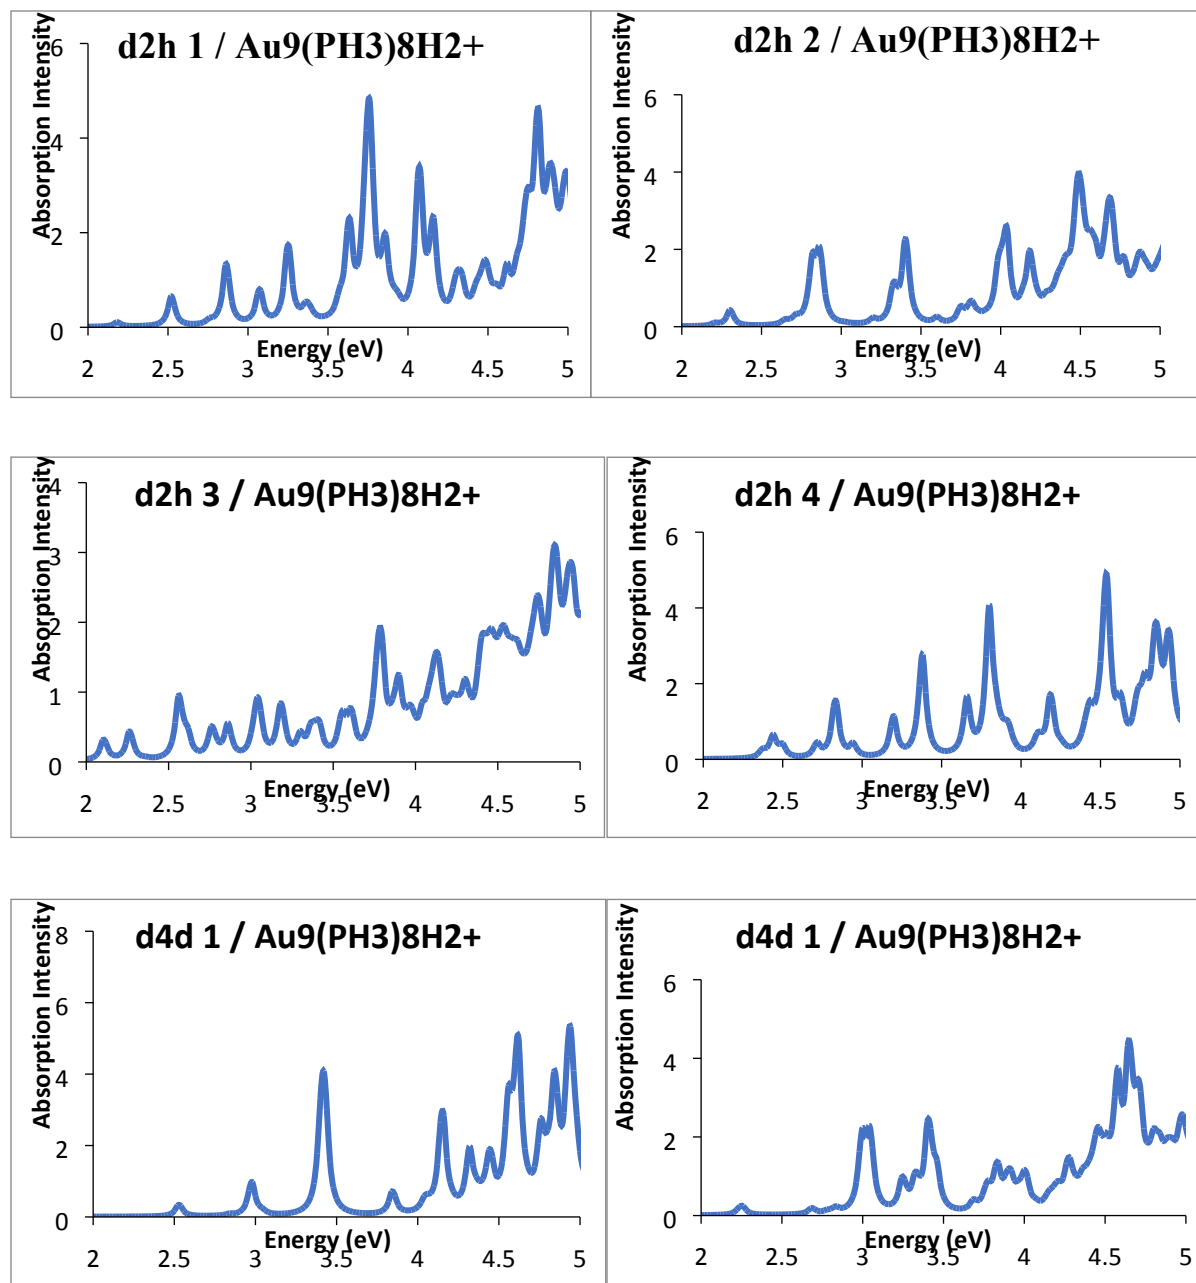

**Figure S3.** Absorption spectra of the optimized structures of  $\text{Au}_9(\text{PH}_3)_8\text{H}_2^+$ .



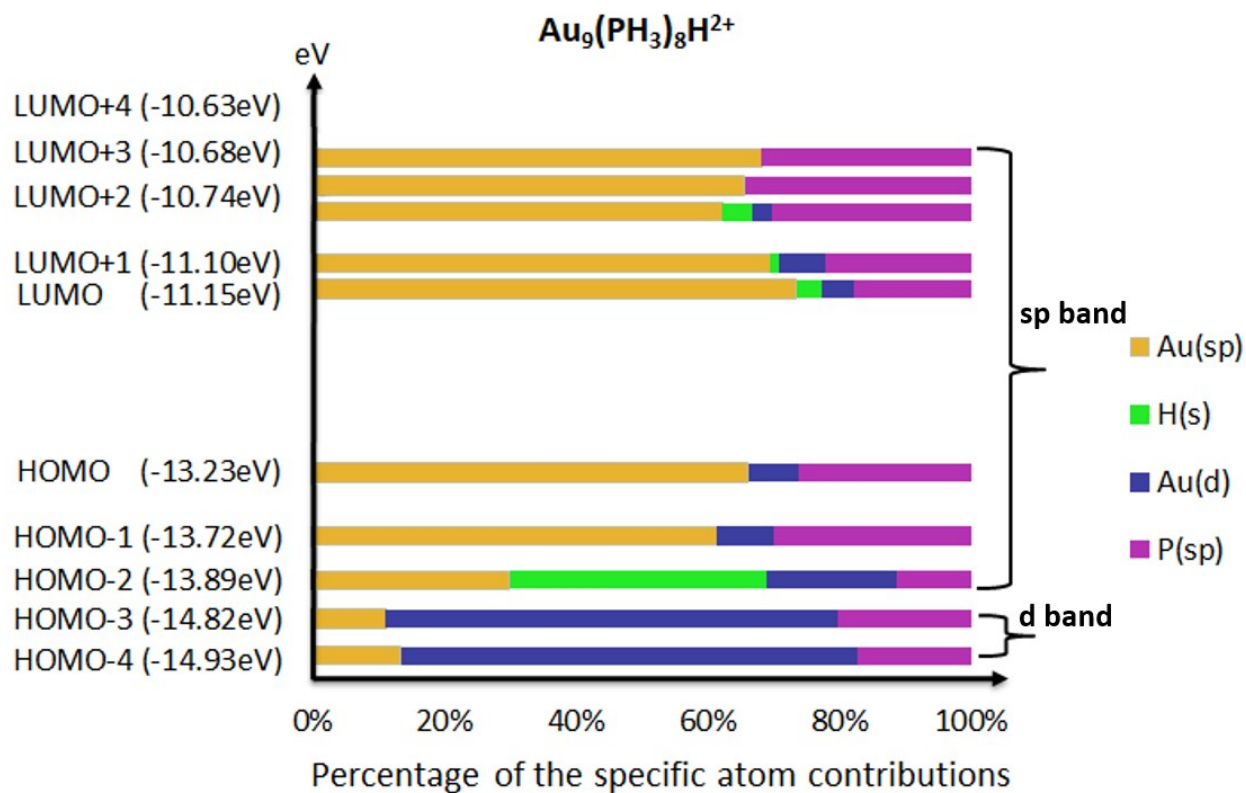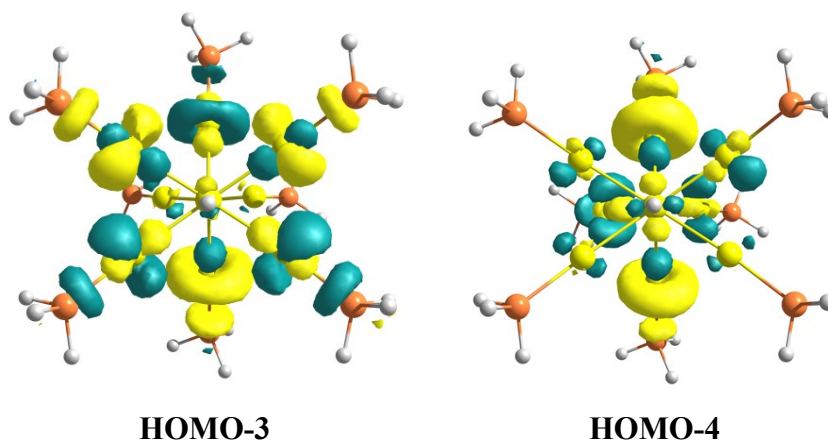

**Figure S4.** Kohn–Sham orbital energy diagram for the most stable structure of Au<sub>9</sub>(PPh<sub>3</sub>)<sub>8</sub>H<sup>2+</sup>. The horizontal colored bar for each Kohn–Sham orbital indicates the percent contributions of the atomic orbitals of Au (sp) in yellow, H(s) in green, Au (d) in blue, and P (sp) in violet. The y axis shows the orbital energy. HOMO-3 and HOMO-4 orbital depictions were given. HOMO, HOMO-1 and HOMO-2 were given in the MS.

**Table S6.** Excited states of Au<sub>9</sub>(PH<sub>3</sub>)<sub>8</sub>H<sup>2+</sup> (D<sub>2h</sub> symmetry (**d2h 2**)). All excited states between 2.0 and 3.9 eV with oscillator strengths larger than 0.01 are listed.

| Energy (eV) | f      | Superatomic character (%) | Weight (%) | Transition |        |
|-------------|--------|---------------------------|------------|------------|--------|
| 2.30        | 0.035  | 99.61                     | 83.57      | HOMO       | LUMO+1 |
| 2.72        | 0.0129 | 99.81                     | 57.84      | HOMO       | LUMO+3 |
|             |        |                           | 19.87      | HOMO       | LUMO+4 |
| 2.82        | 0.1196 | 97.83                     | 65.50      | HOMO-1     | LUMO   |
|             |        |                           | 12.07      | HOMO-1     | LUMO+1 |
| 2.86        | 0.1202 | 98.24                     | 42.76      | HOMO-1     | LUMO+1 |
|             |        |                           | 31.42      | HOMO       | LUMO+2 |
| 2.88        | 0.0251 | 99.76                     | 42.91      | HOMO-2     | LUMO+1 |
|             |        |                           | 33.04      | HOMO-2     | LUMO   |
| 3.33        | 0.0749 | 97.17                     | 86.44      | HOMO-2     | LUMO+3 |
| 3.40        | 0.095  | 97.11                     | 42.19      | HOMO-2     | LUMO+2 |
|             |        |                           | 27.15      | HOMO-2     | LUMO+4 |
|             |        |                           | 17.14      | HOMO-1     | LUMO+4 |
| 3.60        | 0.0126 | 94.83                     | 93.70      | HOMO       | LUMO+6 |
| 3.75        | 0.0315 | 7.44                      | 82.74      | HOMO-3     | LUMO   |
| 3.82        | 0.0245 | 90.96                     | 87.99      | HOMO-1     | LUMO+5 |

**Au<sub>9</sub>(PPh<sub>3</sub>)<sub>8</sub>H<sup>2+</sup>****Table S7.** Excited states of Au<sub>9</sub>(PPh<sub>3</sub>)<sub>8</sub>H<sup>2+</sup>. All excited states between with oscillator strengths larger than 0.02 are listed.

| Energy (eV) | f      | Superatomic character (%) | Weight (%) | Transition |         |
|-------------|--------|---------------------------|------------|------------|---------|
| 1.99        | 0.0239 | 99.98                     | 0.8784     | HOMO       | LUMO+1  |
| 2.13        | 0.0299 | 100                       | 0.5351     | HOMO       | LUMO+3  |
|             |        |                           | 0.2915     | HOMO       | LUMO+2  |
| 2.22        | 0.0218 | 100                       | 0.3526     | HOMO       | LUMO+5  |
|             |        |                           | 0.3365     | HOMO-1     | LUMO    |
|             |        |                           | 0.2152     | HOMO       | LUMO+6  |
| 2.26        | 0.0663 | 100                       | 0.3331     | HOMO-1     | LUMO    |
|             |        |                           | 0.201      | HOMO       | LUMO+6  |
|             |        |                           | 0.1874     | HOMO       | LUMO+8  |
|             |        |                           | 0.1281     | HOMO       | LUMO+5  |
| 2.31        | 0.0419 | 100                       | 0.5307     | HOMO-1     | LUMO+1  |
|             |        |                           | 0.1573     | HOMO       | LUMO+10 |
| 2.38        | 0.0318 | 100                       | 0.4572     | HOMO       | LUMO+12 |
|             |        |                           | 0.3718     | HOMO-1     | LUMO+2  |
| 2.40        | 0.0569 | 100                       | 0.298      | HOMO-1     | LUMO+2  |
|             |        |                           | 0.1311     | HOMO       | LUMO+11 |
|             |        |                           | 0.1303     | HOMO-1     | LUMO+3  |
|             |        |                           | 0.1074     | HOMO-1     | LUMO+1  |
|             |        |                           | 0.1026     | HOMO       | LUMO+13 |
| 2.49        | 0.0215 | 100                       | 0.3783     | HOMO-2     | LUMO    |
|             |        |                           | 0.2479     | HOMO       | LUMO+17 |
|             |        |                           | 0.2284     | HOMO       | LUMO+16 |
| 2.52        | 0.0248 | 100                       | 0.5488     | HOMO       | LUMO+17 |
|             |        |                           | 0.1734     | HOMO       | LUMO+16 |
|             |        |                           | 0.1677     | HOMO-1     | LUMO+5  |
| 2.61        | 0.0386 | 100                       | 0.6574     | HOMO       | LUMO+21 |
|             |        |                           | 0.1052     | HOMO-1     | LUMO+9  |
| 2.67        | 0.0229 | 100                       | 0.8251     | HOMO-1     | LUMO+11 |
| 2.68        | 0.0358 | 99.88                     | 0.7521     | HOMO-1     | LUMO+12 |
| 2.89        | 0.0221 | 99.88                     | 0.7233     | HOMO-1     | LUMO+20 |
| 2.96        | 0.0297 | 100                       | 0.6757     | HOMO-2     | LUMO+10 |
| 3.01        | 0.0230 | 99.75                     | 0.8318     | HOMO-2     | LUMO+13 |
| 3.19        | 0.0220 | 54.49                     | 0.4374     | HOMO-3     | LUMO    |
|             |        |                           | 0.3534     | HOMO-1     | LUMO+35 |
| 3.21        | 0.0220 | 90.79                     | 0.3343     | HOMO-2     | LUMO+20 |
|             |        |                           | 0.1517     | HOMO-1     | LUMO+37 |
|             |        |                           | 0.1279     | HOMO       | LUMO+49 |
|             |        |                           | 0.1052     | HOMO       | LUMO+48 |

|      |        |       |        |        |         |
|------|--------|-------|--------|--------|---------|
| 3.32 | 0.1128 | 33.08 | 0.631  | HOMO-3 | LUMO+1  |
|      |        |       | 0.215  | HOMO   | LUMO+52 |
| 3.35 | 0.0297 | 88.92 | 0.3489 | HOMO   | LUMO+52 |
|      |        |       | 0.176  | HOMO-1 | LUMO+43 |
|      |        |       | 0.155  | HOMO-2 | LUMO+29 |
| 3.37 | 0.0265 | 93.8  | 0.4475 | HOMO-2 | LUMO+29 |
| 3.42 | 0.0229 | 46.63 | 0.337  | HOMO-2 | LUMO+33 |
|      |        |       | 0.2318 | HOMO-3 | LUMO+2  |
|      |        |       | 0.137  | HOMO-5 | LUMO    |
|      |        |       | 0.1058 | HOMO-3 | LUMO+3  |
| 3.45 | 0.0478 | 9.07  | 0.6985 | HOMO-3 | LUMO+3  |
| 3.48 | 0.0341 | 16.92 | 0.5732 | HOMO-6 | LUMO    |
|      |        |       | 0.1719 | HOMO-4 | LUMO+1  |
|      |        |       | 0.1169 | HOMO-1 | LUMO+48 |
| 3.52 | 0.0250 | 23.96 | 0.6286 | HOMO-5 | LUMO+1  |
|      |        |       | 0.167  | HOMO-2 | LUMO+37 |
| 3.53 | 0.0323 | 87.56 | 0.5426 | HOMO-2 | LUMO+37 |
|      |        |       | 0.1318 | HOMO-1 | LUMO+49 |
| 3.65 | 0.0307 | 1.00  | 0.8513 | HOMO-5 | LUMO+2  |
| 3.67 | 0.0329 | 35.33 | 0.3175 | HOMO-1 | LUMO+52 |
|      |        |       | 0.3001 | HOMO-3 | LUMO+10 |
| 3.72 | 0.0233 | 22.09 | 0.6636 | HOMO-4 | LUMO+4  |
|      |        |       | 0.1617 | HOMO-2 | LUMO+44 |
| 3.77 | 0.0336 | 2.44  | 0.8055 | HOMO-4 | LUMO+5  |

### $\text{Au}_9(\text{PH}_3)_8\text{F}^{2+}$

**Table S8.** Relative energies at the revTPSS/TZP level of  $\text{Au}_9(\text{PH}_3)_8\text{F}^{2+}$ . d2h # and d4d # represent different optimized geometries derived from different starting positions of the fluoride on the unsubstituted  $D_{2h}$  and  $D_{4d}$  symmetries of  $\text{Au}_9(\text{PH}_3)_8^{3+}$ . The structure indicated in bold (**d4d 2**) is the most stable structure, described in the manuscript.

|              | $\Delta(\text{kcal/mol})$ |
|--------------|---------------------------|
| d2h 1        | 10.60                     |
| d2h 2        | 10.70                     |
| d2h 3        | 8.11                      |
| d4d 1        | 10.23                     |
| <b>d4d 2</b> | <b>0.00</b>               |

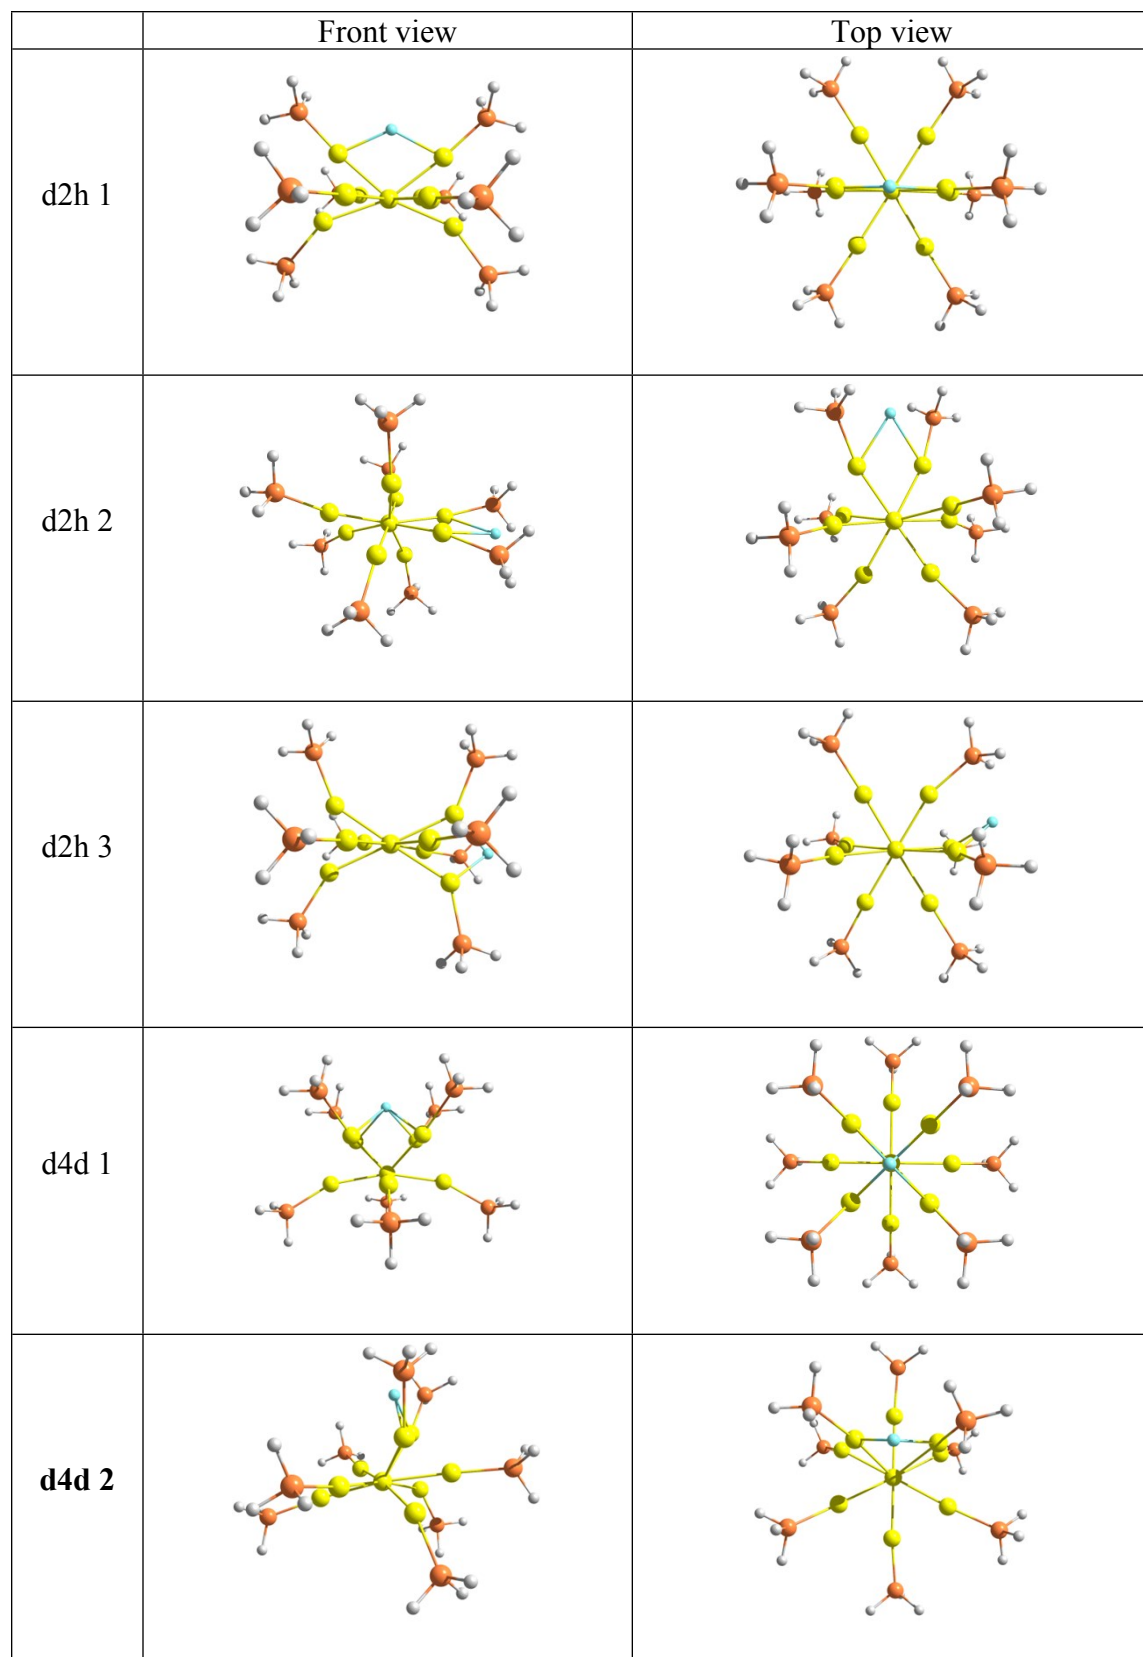

**Figure S5.** Optimized structures of the  $\text{Au}_9(\text{PH}_3)_8\text{F}^{2+}$  at revTPSS/TZP level of theory

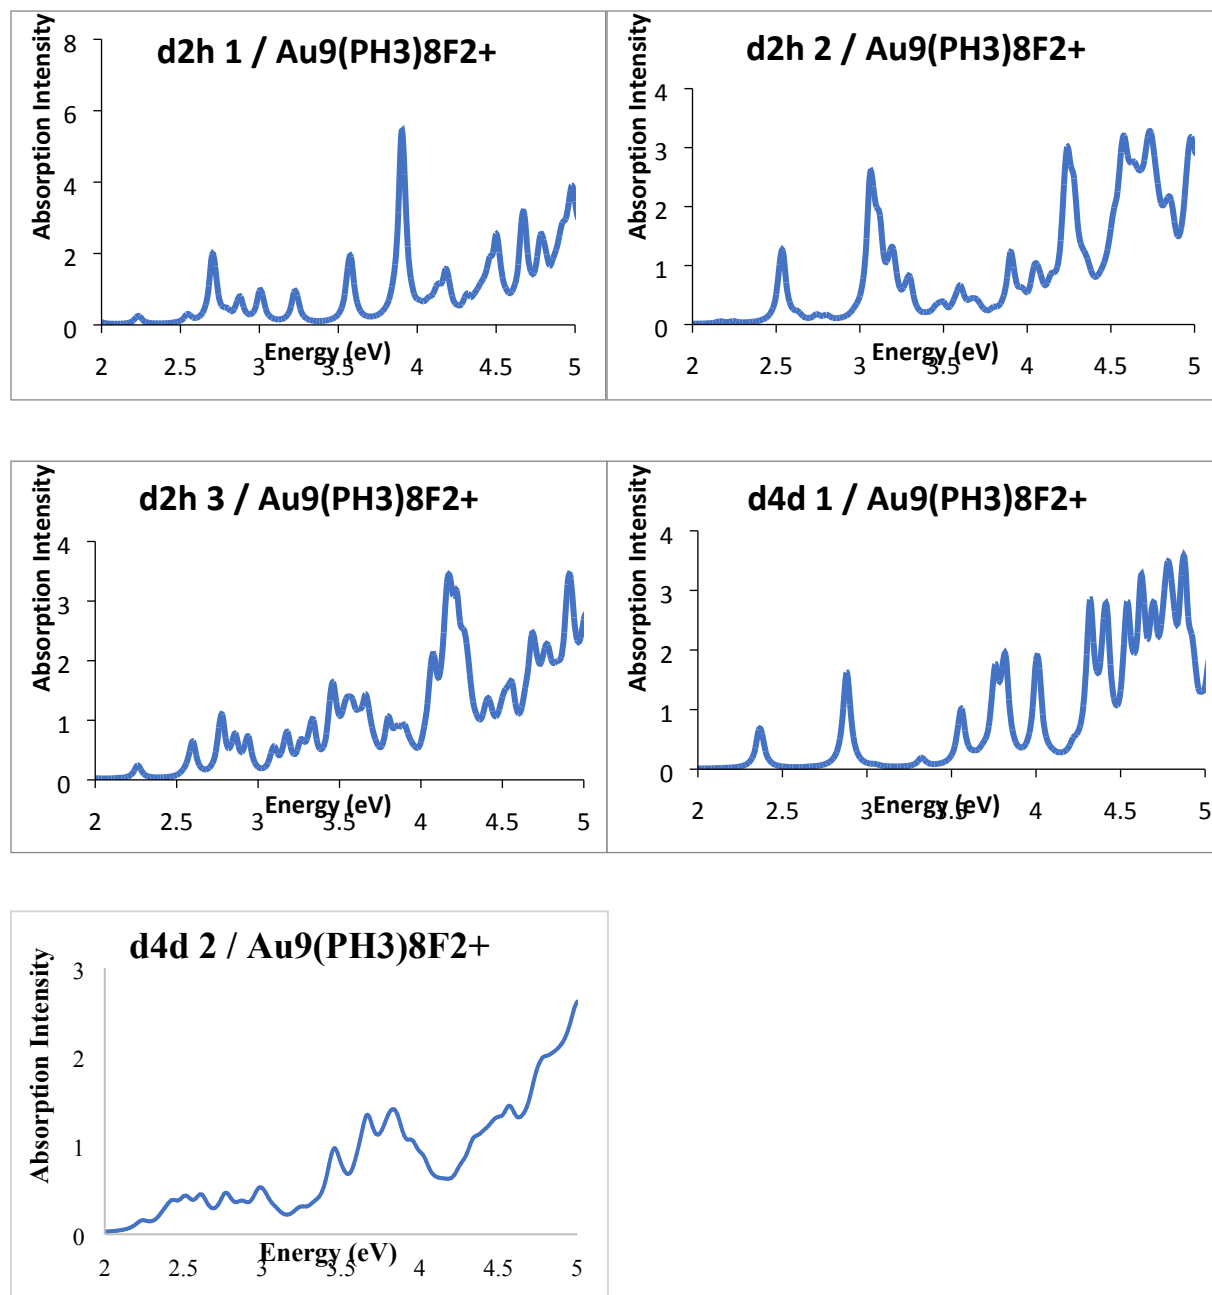

**Figure S6.** Absorption spectrums of fluoride ligated structures.

**Table S9.** Excited states of Au<sub>9</sub>(PH<sub>3</sub>)<sub>8</sub>F<sup>2+</sup> (D<sub>4d</sub> symmetry (**d4d 2**)). All excited states between 2.0 and 3.9 eV with oscillator strengths larger than 0.01 are listed.

| Energy (eV) | f      | Superatomic character (%) | Weight (%) | Transition |         |
|-------------|--------|---------------------------|------------|------------|---------|
| 2.24        | 0.0161 | 99.12                     | 65.79      | HOMO       | LUMO    |
| 2.43        | 0.0356 | 95.84                     | 52.67      | HOMO -1    | LUMO    |
|             |        |                           | 19.76      | HOMO       | LUMO +1 |
|             |        |                           | 15.72      | HOMO       | LUMO +2 |
| 2.51        | 0.0432 | 97.18                     | 79.35      | HOMO -1    | LUMO +1 |
| 2.61        | 0.0509 | 94.28                     | 79.58      | HOMO       | LUMO +2 |
| 2.77        | 0.0554 | 93.32                     | 83.53      | HOMO -1    | LUMO +2 |
| 2.87        | 0.0283 | 4.43                      | 72.94      | HOMO -2    | LUMO    |
|             |        |                           | 18.00      | HOMO -2    | LUMO +1 |
| 2.98        | 0.0457 | 9.43                      | 74.60      | HOMO -2    | LUMO +1 |
|             |        |                           | 11.21      | HOMO -2    | LUMO    |
| 3.25        | 0.0151 | 70.94                     | 29.31      | HOMO       | LUMO +4 |
|             |        |                           | 29.07      | HOMO -1    | LUMO +3 |
|             |        |                           | 23.94      | HOMO -2    | LUMO +2 |
| 3.33        | 0.0165 | 1.27                      | 76.16      | HOMO -3    | LUMO +2 |
|             |        |                           | 19.20      | HOMO -4    | LUMO    |
| 3.46        | 0.1022 | 17.72                     | 54.79      | HOMO -4    | LUMO    |
|             |        |                           | 14.48      | HOMO       | LUMO +5 |
|             |        |                           | 11.52      | HOMO -3    | LUMO +2 |
| 3.67        | 0.1323 | 46.21                     | 25.07      | HOMO -1    | LUMO +5 |
|             |        |                           | 17.62      | HOMO -6    | LUMO    |
|             |        |                           | 10.93      | HOMO -4    | LUMO +2 |
|             |        |                           | 9.21       | HOMO -4    | LUMO +1 |
| 3.80        | 0.0672 | 34.79                     | 26.16      | HOMO -1    | LUMO +6 |
|             |        |                           | 23.80      | HOMO -3    | LUMO +3 |
|             |        |                           | 18.76      | HOMO -4    | LUMO +2 |
| 3.85        | 0.0571 | 6.4                       | 41.57      | HOMO -3    | LUMO +3 |
|             |        |                           | 33.78      | HOMO -2    | LUMO +4 |

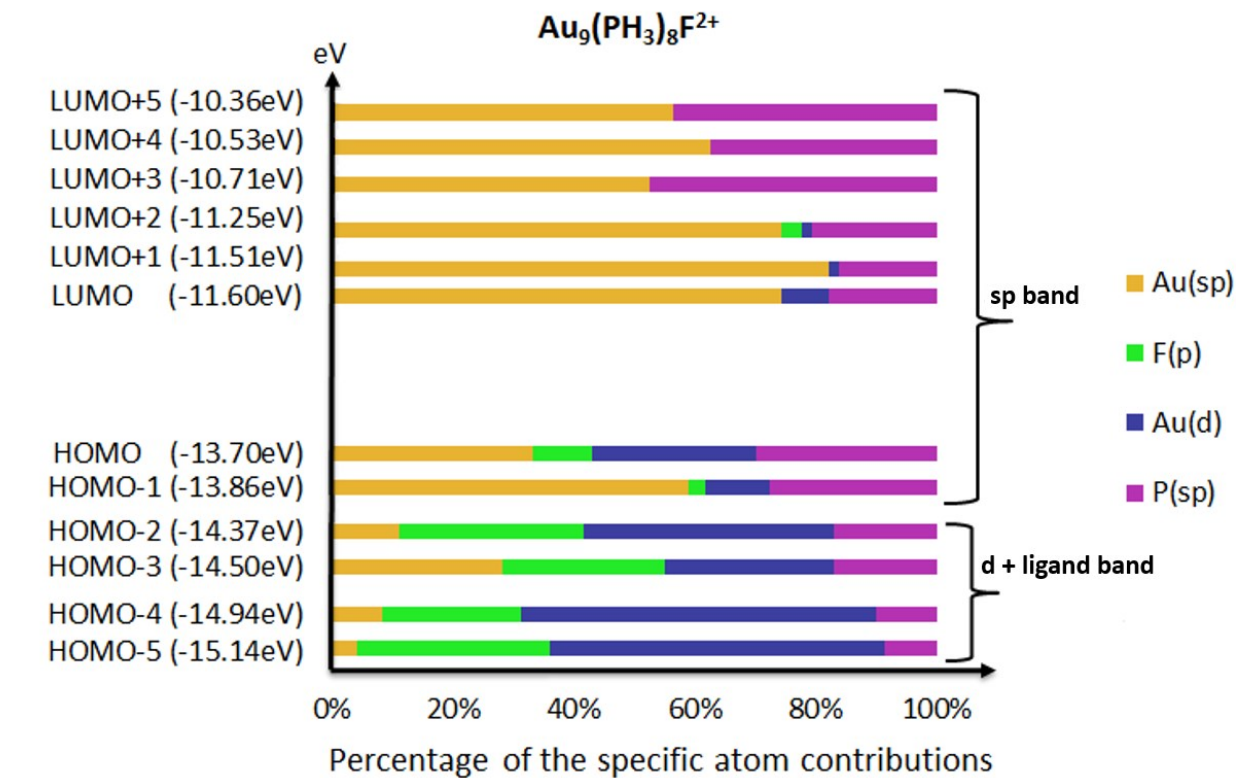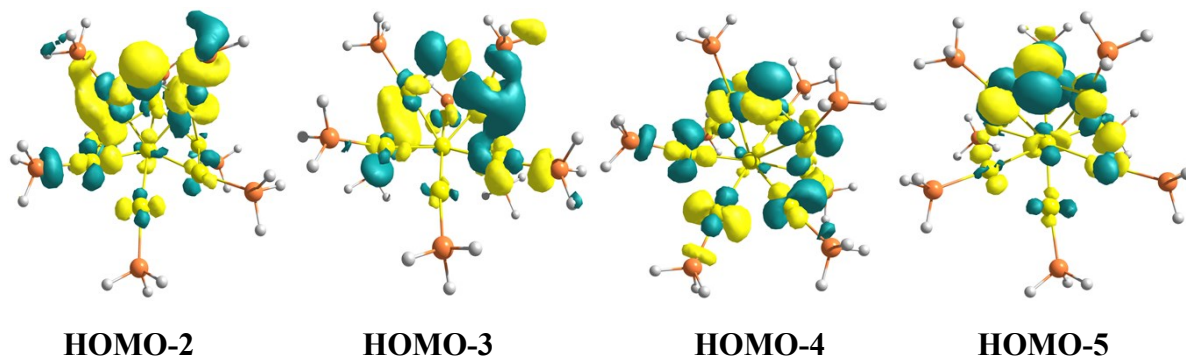

**Figure S7.** Kohn–Sham orbital energy level diagram for the  $\text{Au}_9(\text{PH}_3)_8\text{F}^{2+}$  structure. Each KS orbital is drawn to indicate the relative contributions (line length with color labels) of the atomic orbitals of Au (sp) in gold, F(s) in green, Au (d) in blue, and P (sp) in purple. The y axis shows the M.O. and energy level. X axis shows the percentage of the specific atom contributions. HOMO-2, HOMO-3, HOMO-4 and HOMO-5 orbital depictions were given. HOMO and HOMO-1 were given in the MS.



**Au<sub>9</sub>(PPh<sub>3</sub>)<sub>8</sub>F<sup>2+</sup>****Table S10.** Excited states of Au<sub>9</sub>(PPh<sub>3</sub>)<sub>8</sub>F<sup>2+</sup>. All excited states between with oscillator strengths larger than 0.02 are listed.

| Energy (eV) | f      | Superatomic character (%) | Weight (%) | Transition |         |
|-------------|--------|---------------------------|------------|------------|---------|
| 2.00        | 0.0464 | 99.78                     | 92.02%     | HOMO       | LUMO    |
| 2.12        | 0.0311 | 99.95                     | 77.05%     | HOMO       | LUMO+2  |
| 2.26        | 0.0463 | 99.48                     | 60.65%     | HOMO-1     | LUMO    |
|             |        |                           | 22.45%     | HOMO-1     | LUMO    |
| 2.28        | 0.0648 | 98.8                      | 65.37%     | HOMO-1     | LUMO+1  |
| 2.35        | 0.0344 | 99.81                     | 79.84%     | HOMO       | LUMO+4  |
| 2.37        | 0.0706 | 99.61                     | 59.63%     | HOMO-1     | LUMO+2  |
|             |        |                           | 20.03%     | HOMO       | LUMO+5  |
| 2.62        | 0.0454 | 98.95                     | 65.92%     | HOMO       | LUMO+13 |
|             |        |                           | 12.72%     | HOMO       | LUMO+12 |
|             |        |                           | 12.56%     | HOMO-1     | LUMO+6  |
| 2.71        | 0.0201 | 86.2                      | 72.59%     | HOMO       | LUMO+17 |
| 2.74        | 0.0231 | 44.05                     | 49.12%     | HOMO-2     | LUMO+1  |
|             |        |                           | 16.53%     | HOMO       | LUMO+19 |
| 2.78        | 0.0463 | 86.29                     | 66.08%     | HOMO       | LUMO+21 |
|             |        |                           | 10.25%     | HOMO-2     | LUMO+1  |
| 2.83        | 0.0300 | 45.04                     | 51.42%     | HOMO-2     | LUMO+2  |
|             |        |                           | 27.35%     | HOMO-1     | LUMO+13 |
| 2.95        | 0.0397 | 40.34                     | 36.31%     | HOMO-4     | LUMO    |
|             |        |                           | 21.61%     | HOMO-1     | LUMO+18 |
|             |        |                           | 16.26%     | HOMO-3     | LUMO    |
| 2.97        | 0.0380 | 93.58                     | 68.95%     | HOMO-1     | LUMO+19 |
| 2.97        | 0.0371 | 84.75                     | 64.30%     | HOMO-1     | LUMO+20 |
|             |        |                           | 13.07%     | HOMO-1     | LUMO+19 |
| 3.01        | 0.0270 | 87.51                     | 65.36%     | HOMO-1     | LUMO+21 |
|             |        |                           | 16.80%     | HOMO       | LUMO+30 |
| 3.02        | 0.0448 | 43.44                     | 29.04%     | HOMO-1     | LUMO+22 |
|             |        |                           | 28.55%     | HOMO-4     | LUMO+1  |
|             |        |                           | 22.08%     | HOMO-3     | LUMO+1  |
| 3.04        | 0.0294 | 74.1                      | 64.12%     | HOMO       | LUMO+31 |
|             |        |                           | 21.10%     | HOMO-3     | LUMO+1  |
| 3.05        | 0.0321 | 80.61                     | 48.47%     | HOMO       | LUMO+33 |
| 3.06        | 0.0379 | 84.4                      | 47.29%     | HOMO       | LUMO+33 |
| 3.08        | 0.0425 | 11.39                     | 77.17%     | HOMO-3     | LUMO+2  |
| 3.16        | 0.0335 | 37.25                     | 44.05%     | HOMO-4     | LUMO+2  |
|             |        |                           | 29.94%     | HOMO       | LUMO+39 |
| 3.19        | 0.0219 | 48.33                     | 47.32%     | HOMO-5     | LUMO    |
|             |        |                           | 36.12%     | HOMO       | LUMO+40 |

|      |        |       |        |        |         |
|------|--------|-------|--------|--------|---------|
| 3.21 | 0.0304 | 79.88 | 52.27% | HOMO   | LUMO+41 |
|      |        |       | 18.13% | HOMO   | LUMO+40 |
|      |        |       | 16.80% | HOMO-5 | LUMO    |
| 3.24 | 0.0264 | 54.07 | 44.84% | HOMO   | LUMO+43 |
|      |        |       | 30.48% | HOMO-5 | LUMO+1  |
| 3.25 | 0.0276 | 52.92 | 34.96% | HOMO   | LUMO+43 |
|      |        |       | 30.50% | HOMO-5 | LUMO+1  |

### $\text{Au}_9(\text{PH}_3)_8\text{Cl}^{2+}$

**Table S11.** Relative energies at the revTPSS/TZP level of  $\text{Au}_9(\text{PH}_3)_8\text{Cl}^{2+}$ . d2h # and d4d # represent different optimized geometries derived from different starting positions of the chloride on the unsubstituted  $D_{2h}$  and  $D_{4d}$  symmetries of  $\text{Au}_9(\text{PH}_3)_8^{3+}$ . The structure indicated in bold (**d4d 2**) is the most stable structure, described in the manuscript.

| Name         | $\Delta(\text{kcal/mol})$ |
|--------------|---------------------------|
| d2h 1        | 3.77                      |
| d2h 2        | 8.93                      |
| d2h 3        | 6.16                      |
| d4d 1        | 9.44                      |
| <b>d4d 2</b> | 0.00                      |

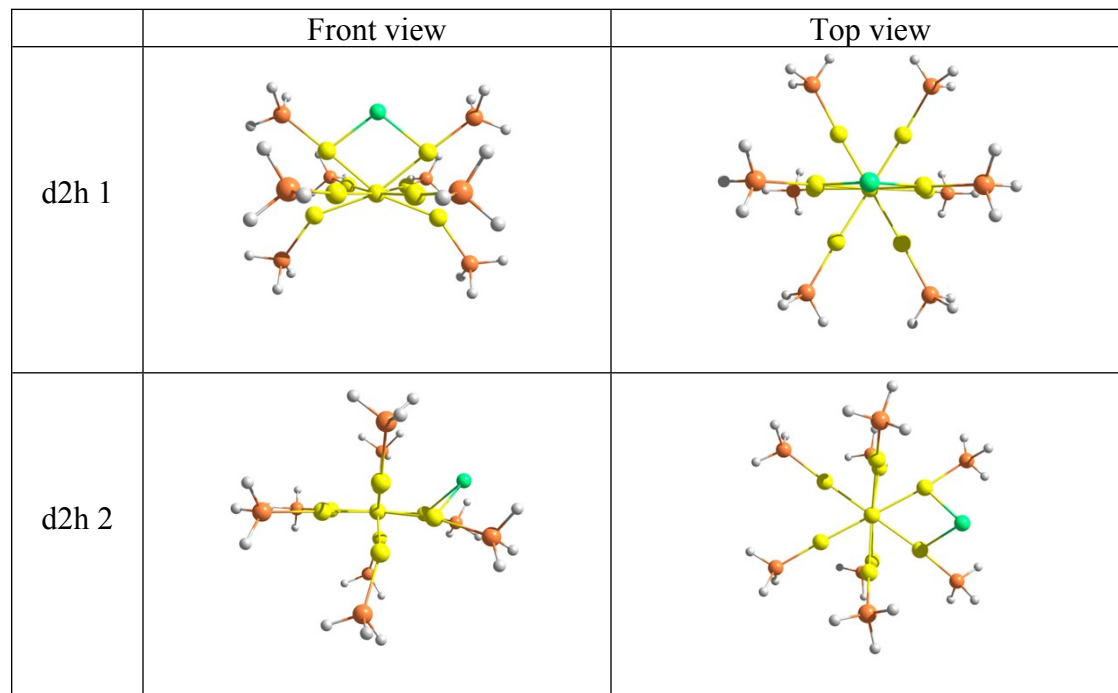

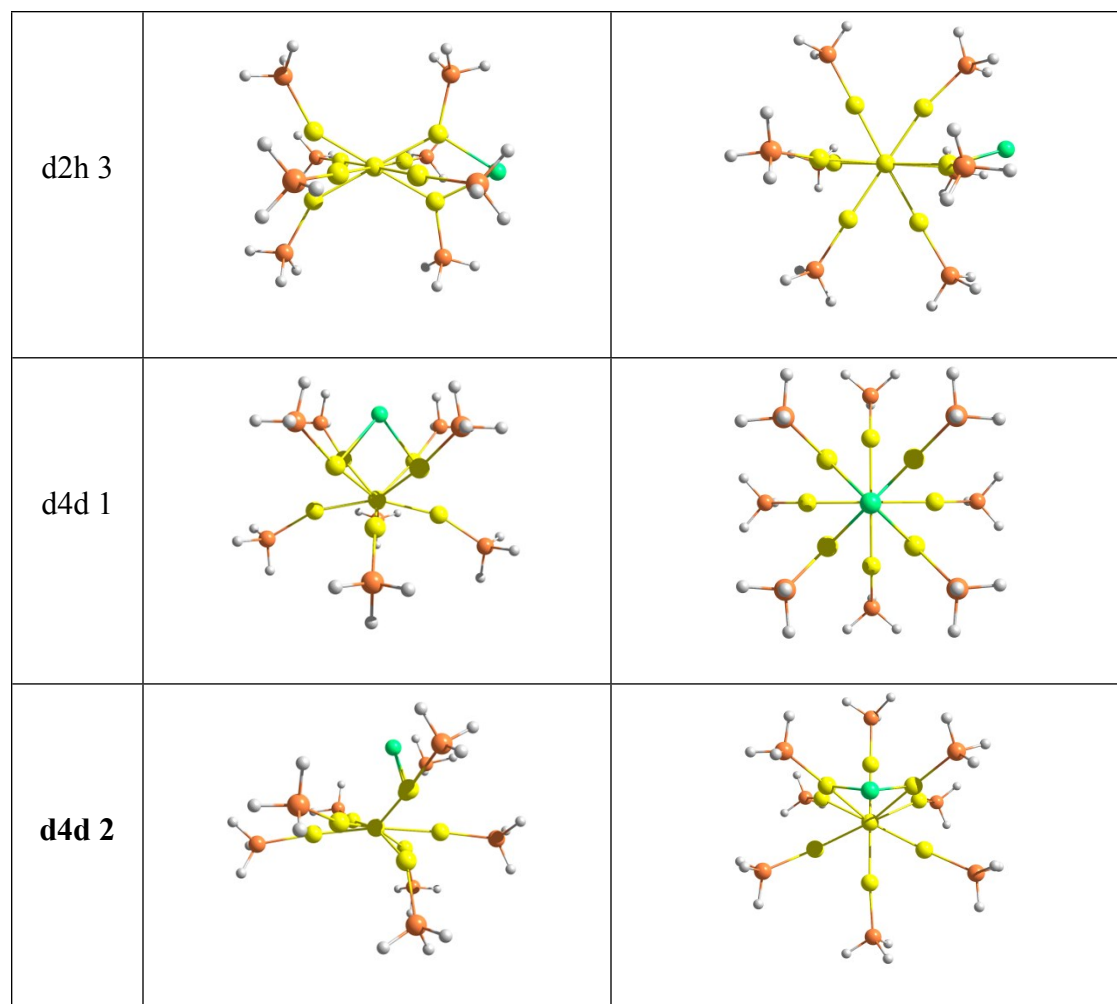

**Figure S8.** Optimized structures of the  $\text{Au}_9(\text{PH}_3)_8\text{Cl}_2^+$  at revTPSS/TZP level of theory

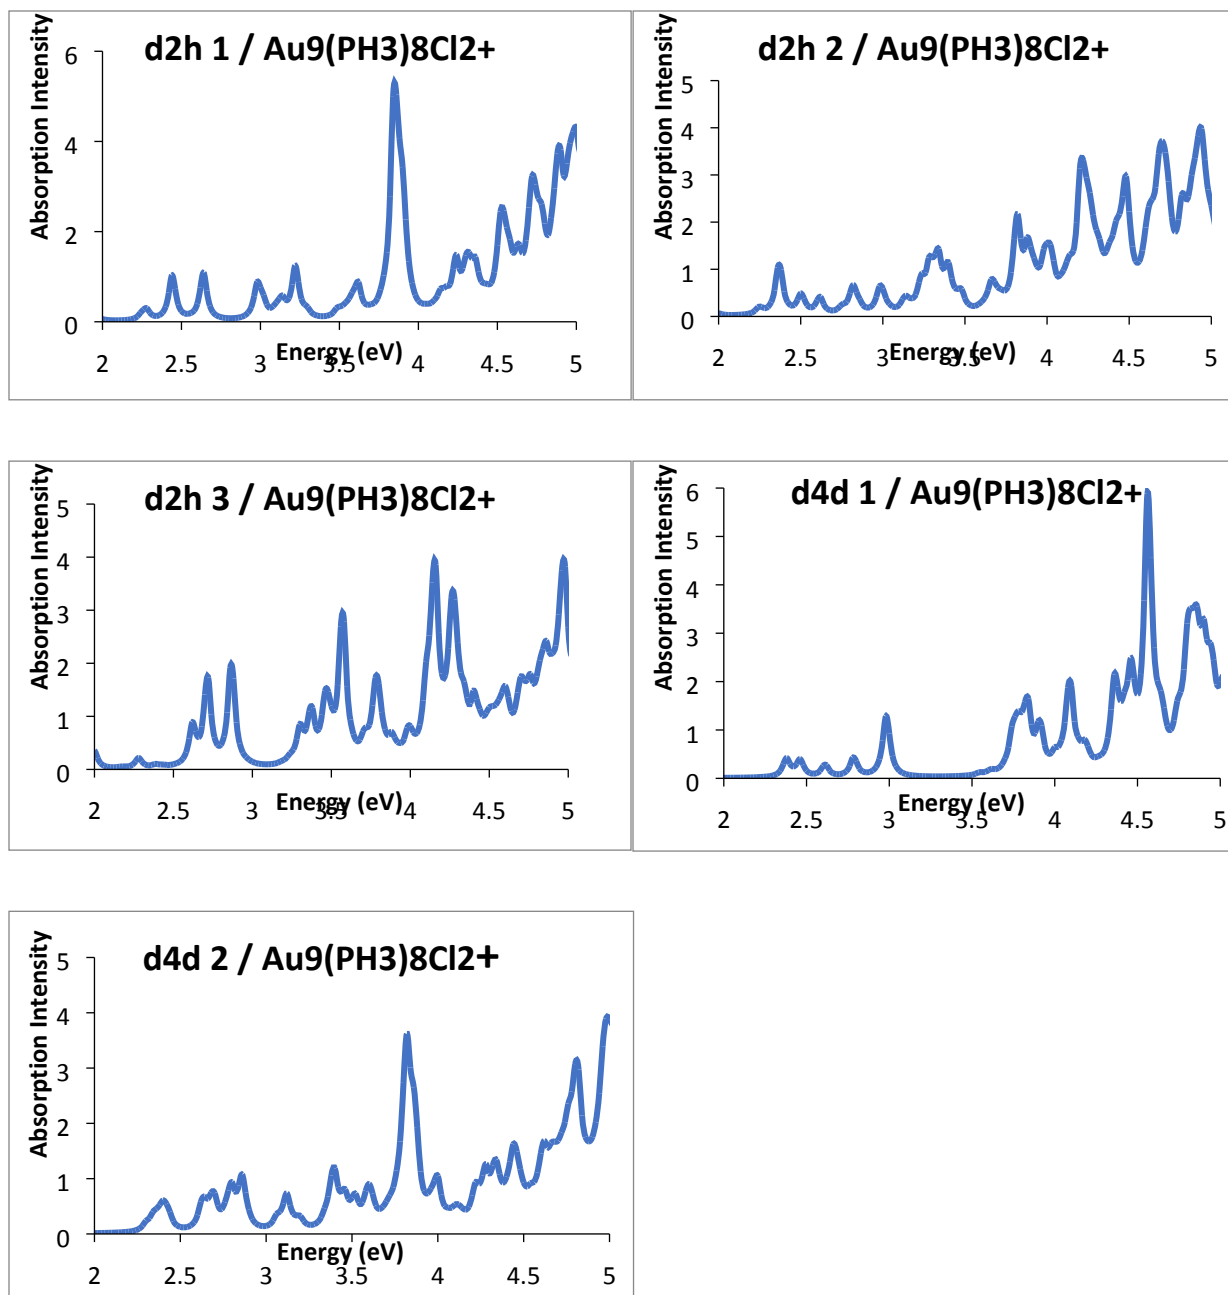

**Figure S9.** Absorption spectrums of chloride ligated structures.

**Table S12.** Excited states of Au<sub>9</sub>(PH<sub>3</sub>)<sub>8</sub>Cl<sup>2+</sup> (*D*<sub>4d</sub> symmetry (**d4d 2**)). All excited states between 2.0 and 3.9 eV with oscillator strengths larger than 0.01 are listed.

| Energy (eV) | f      | Superatomic character (%) | Weight (%) | Transition |         |
|-------------|--------|---------------------------|------------|------------|---------|
|             |        |                           |            |            |         |
| 2.39        | 0.033  | 85.23                     | 37.49      | HOMO       | LUMO +1 |
|             |        |                           | 23.47      | HOMO -1    | LUMO    |
|             |        |                           | 19.22      | HOMO -1    | LUMO +1 |
| 2.64        | 0.0187 | 76.55                     | 10.00      | HOMO -2    | LUMO    |
|             |        |                           | 37.30      | HOMO       | LUMO +2 |
|             |        |                           | 36.16      | HOMO -1    | LUMO +2 |
|             |        |                           | 9.56       | HOMO -3    | LUMO +1 |
| 2.70        | 0.0401 | 82.05                     | 9.24       | HOMO -2    | LUMO    |
|             |        |                           | 40.20      | HOMO -1    | LUMO +2 |
|             |        |                           | 35.56      | HOMO       | LUMO +2 |
|             |        |                           | 11.40      | HOMO -3    | LUMO    |
| 2.80        | 0.0535 | 11.54                     | 46.67      | HOMO -3    | LUMO    |
|             |        |                           | 36.00      | HOMO -4    | LUMO    |
| 2.86        | 0.0731 | 10.86                     | 72.91      | HOMO -3    | LUMO +1 |
| 3.12        | 0.0489 | 3.41                      | 89.18      | HOMO -3    | LUMO +2 |
| 3.40        | 0.0631 | 39.74                     | 29.97      | HOMO -5    | LUMO    |
|             |        |                           | 26.92      | HOMO       | LUMO +4 |
|             |        |                           | 25.12      | HOMO -5    | LUMO +1 |
|             |        |                           | 35.04      | HOMO -5    | LUMO +1 |
| 3.46        | 0.0409 | 57.9                      | 17.84      | HOMO -1    | LUMO +4 |
|             |        |                           | 15.60      | HOMO       | LUMO +5 |
|             |        |                           | 12.77      | HOMO       | LUMO +4 |
|             |        |                           | 10.49      | HOMO -1    | LUMO +5 |
|             |        |                           | 51.76      | HOMO -1    | LUMO +5 |
| 3.52        | 0.0381 | 90.04                     | 36.16      | HOMO       | LUMO +5 |
|             |        |                           | 62.10      | HOMO -3    | LUMO +3 |
| 3.58        | 0.0241 | 19.96                     | 9.56       | HOMO -5    | LUMO +2 |
|             |        |                           | 9.47       | HOMO -1    | LUMO +5 |
|             |        |                           | 33.41      | HOMO -3    | LUMO +3 |
| 3.60        | 0.033  | 27.5                      | 31.24      | HOMO -5    | LUMO +2 |

|      |        |       |       |         |         |
|------|--------|-------|-------|---------|---------|
|      |        |       | 10.57 | HOMO    | LUMO +5 |
|      |        |       | 9.54  | HOMO -1 | LUMO +5 |
| 3.82 | 0.2062 | 23.35 | 25.36 | HOMO -8 | LUMO +1 |
|      |        |       | 19.24 | HOMO -5 | LUMO +2 |
|      |        |       | 9.82  | HOMO    | LUMO +5 |
|      |        |       | 8.96  | HOMO -7 | LUMO +1 |

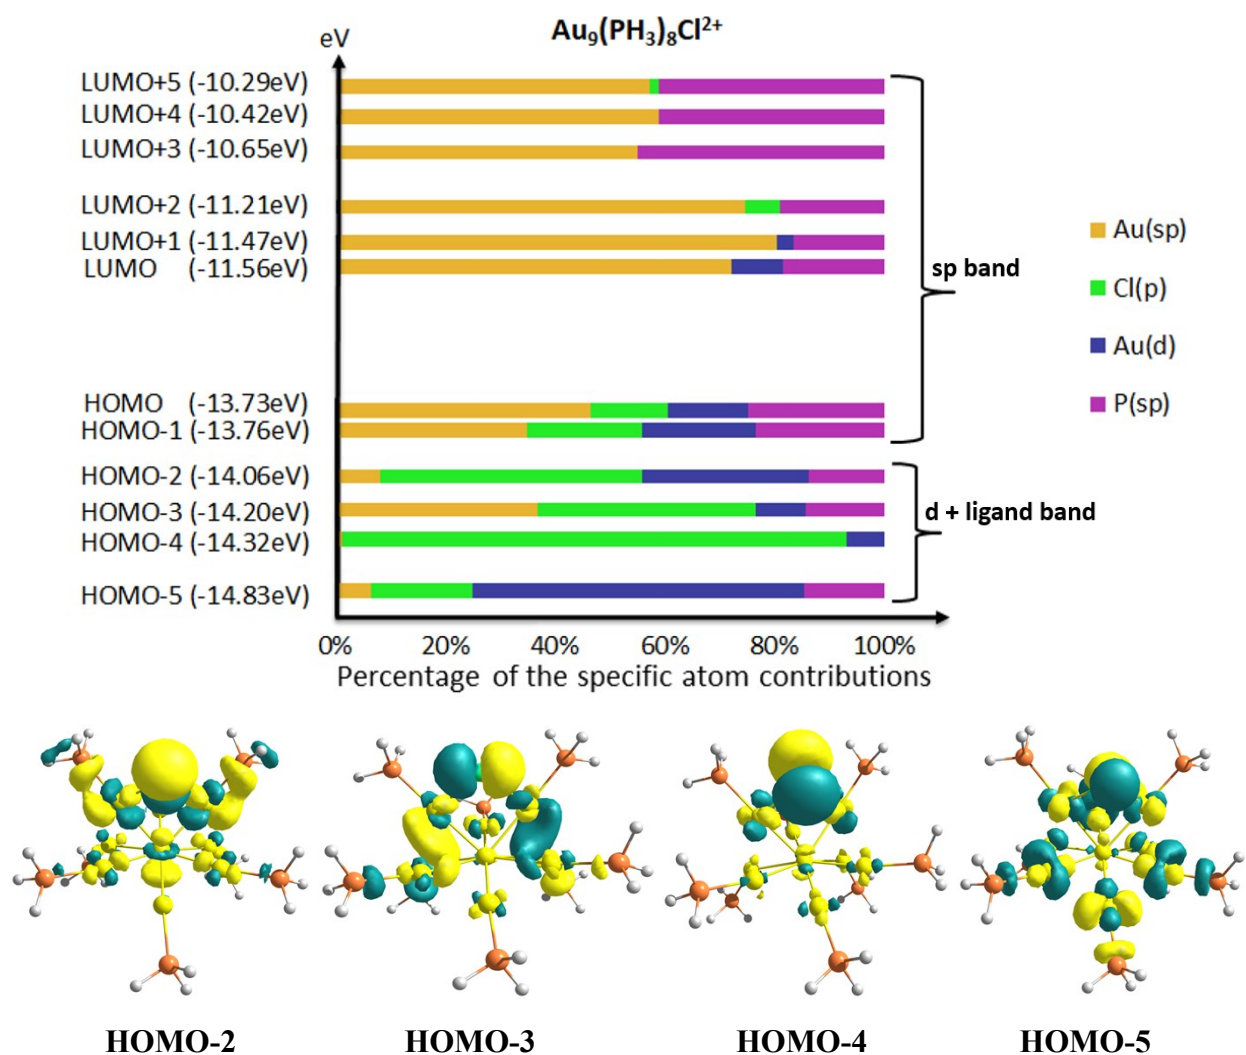

**Figure S10.** Kohn–Sham orbital energy level diagram for the Au<sub>9</sub>(PH<sub>3</sub>)<sub>8</sub>Cl<sup>2+</sup> structure. Each KS orbital is drawn to indicate the relative contributions (line length with color labels) of the atomic orbitals of Au (sp) in gold, Cl(s) in green, Au (d) in blue, and P (sp) in purple. The y axis shows the M.O. and energy level. X axis shows the percentage of the specific atom contributions. HOMO-2, HOMO-3, HOMO-4 and HOMO-5 orbital depictions were given. HOMO and HOMO-1 were given in the MS.

**Au<sub>9</sub>(PPh<sub>3</sub>)<sub>8</sub>Cl<sup>2+</sup>****Table S13.** Excited states of Au<sub>9</sub>(PPh<sub>3</sub>)<sub>8</sub>Cl<sup>2+</sup>. All excited states with oscillator strengths larger than 0.02 are listed.

| Energy (eV) | f      | Superatomic character (%) | Weight (%) | Transition |         |
|-------------|--------|---------------------------|------------|------------|---------|
| 1.81        | 0.0548 | 99.81                     | 93.64%     | HOMO       | LUMO+1  |
| 2.32        | 0.0250 | 99.72                     | 43.11%     | HOMO       | LUMO+11 |
|             |        |                           | 39.71%     | HOMO       | LUMO+10 |
| 2.33        | 0.0269 | 99.74                     | 48.01%     | HOMO       | LUMO+11 |
|             |        |                           | 19.28%     | HOMO       | LUMO+9  |
|             |        |                           | 10.76%     | HOMO       | LUMO+10 |
|             |        |                           | 10.54%     | HOMO-1     | LUMO+1  |
| 2.39        | 0.0630 | 98.48                     | 58.25%     | HOMO-1     | LUMO+2  |
|             |        |                           | 33.39%     | HOMO       | LUMO+14 |
| 2.40        | 0.0403 | 98.68                     | 61.36%     | HOMO       | LUMO+14 |
|             |        |                           | 30.25%     | HOMO-1     | LUMO+2  |
| 2.44        | 0.0252 | 96.81                     | 79.69%     | HOMO       | LUMO+15 |
|             |        |                           | 10.42%     | HOMO       | LUMO+16 |
| 2.49        | 0.0474 | 98.98                     | 77.88%     | HOMO       | LUMO+16 |
| 2.55        | 0.0278 | 8.86                      | 86.45%     | HOMO-2     | LUMO+1  |
| 2.87        | 0.0360 | 70.48                     | 55.26%     | HOMO-1     | LUMO+14 |
|             |        |                           | 13.55%     | HOMO-4     | LUMO    |
|             |        |                           | 10.10%     | HOMO       | LUMO+34 |
| 2.91        | 0.0430 | 28.69                     | 47.45%     | HOMO-5     | LUMO    |
|             |        |                           | 15.23%     | HOMO-1     | LUMO+15 |
| 2.99        | 0.0227 | 37.07                     | 39.01%     | HOMO-4     | LUMO+2  |
|             |        |                           | 12.63%     | HOMO-1     | LUMO+18 |
|             |        |                           | 11.14%     | HOMO-5     | LUMO+1  |
|             |        |                           | 10.61%     | HOMO-1     | LUMO+19 |
| 3.00        | 0.0319 | 34.98                     | 24.12%     | HOMO-4     | LUMO+2  |
|             |        |                           | 20.10%     | HOMO-5     | LUMO+1  |
|             |        |                           | 19.28%     | HOMO-1     | LUMO+20 |
|             |        |                           | 13.23%     | HOMO-3     | LUMO+3  |
| 3.03        | 0.0457 | 76.32                     | 31.82%     | HOMO       | LUMO+42 |
|             |        |                           | 15.10%     | HOMO-1     | LUMO+21 |
|             |        |                           | 14.63%     | HOMO       | LUMO+43 |
| 3.08        | 0.0338 | 28.05                     | 63.99%     | HOMO-5     | LUMO+2  |

**Au<sub>9</sub>(PH<sub>3</sub>)<sub>8</sub>Br<sup>2+</sup>**

**Table S14.** Relative energies at the revTPSS/TZP level of Au<sub>9</sub>(PH<sub>3</sub>)<sub>8</sub>Br<sup>2+</sup>. d2h # and d4d # represent different optimized geometries derived from different starting positions of the bromide on the unsubstituted D<sub>2h</sub> and D<sub>4d</sub> symmetries of Au<sub>9</sub>(PH<sub>3</sub>)<sub>8</sub><sup>3+</sup>. The structure indicated in bold (**d4d 2**) is the most stable structure, described in the manuscript.

| Name         | Δ(kcal/mol) |
|--------------|-------------|
| d2h 1        | 6.74        |
| d2h 2        | 10.98       |
| d2h 3        | 5.88        |
| d4d 1        | 9.42        |
| <b>d4d 2</b> | <b>0.00</b> |



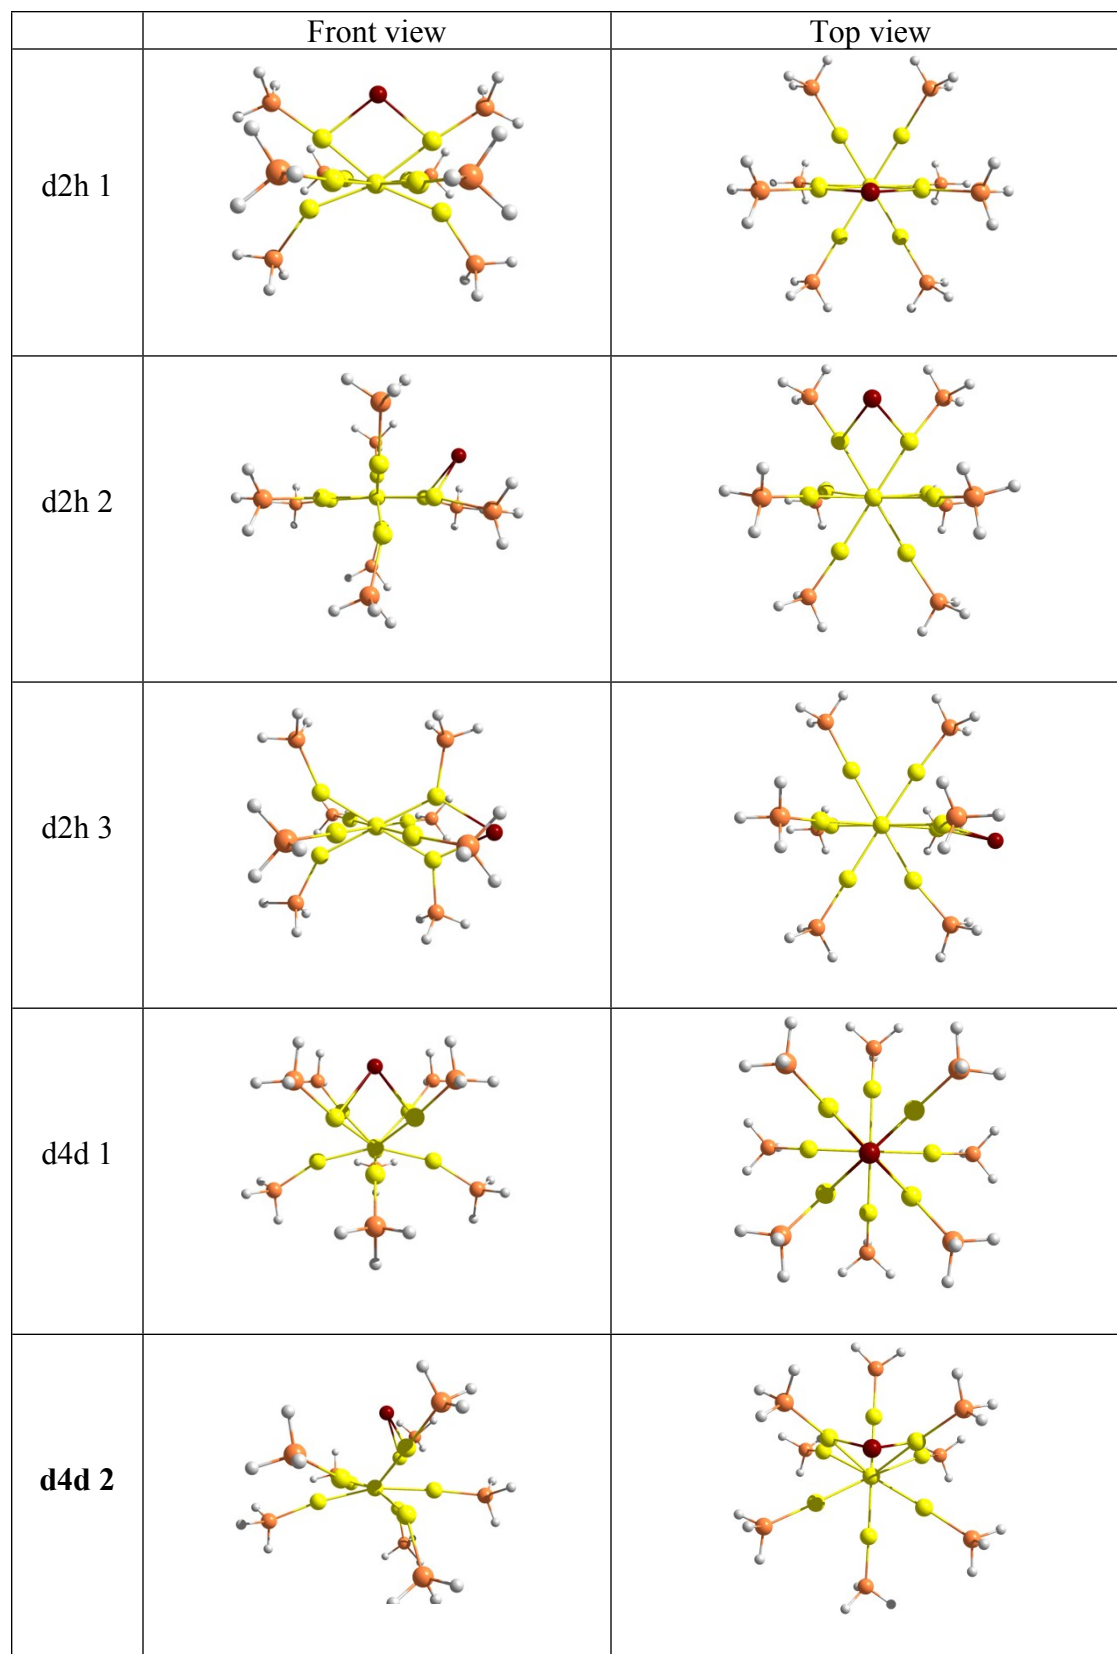

**Figure S11.** Optimized structures of the  $\text{Au}_9(\text{PH}_3)_8\text{Br}^{2+}$  at revTPSS/TZP level of theory

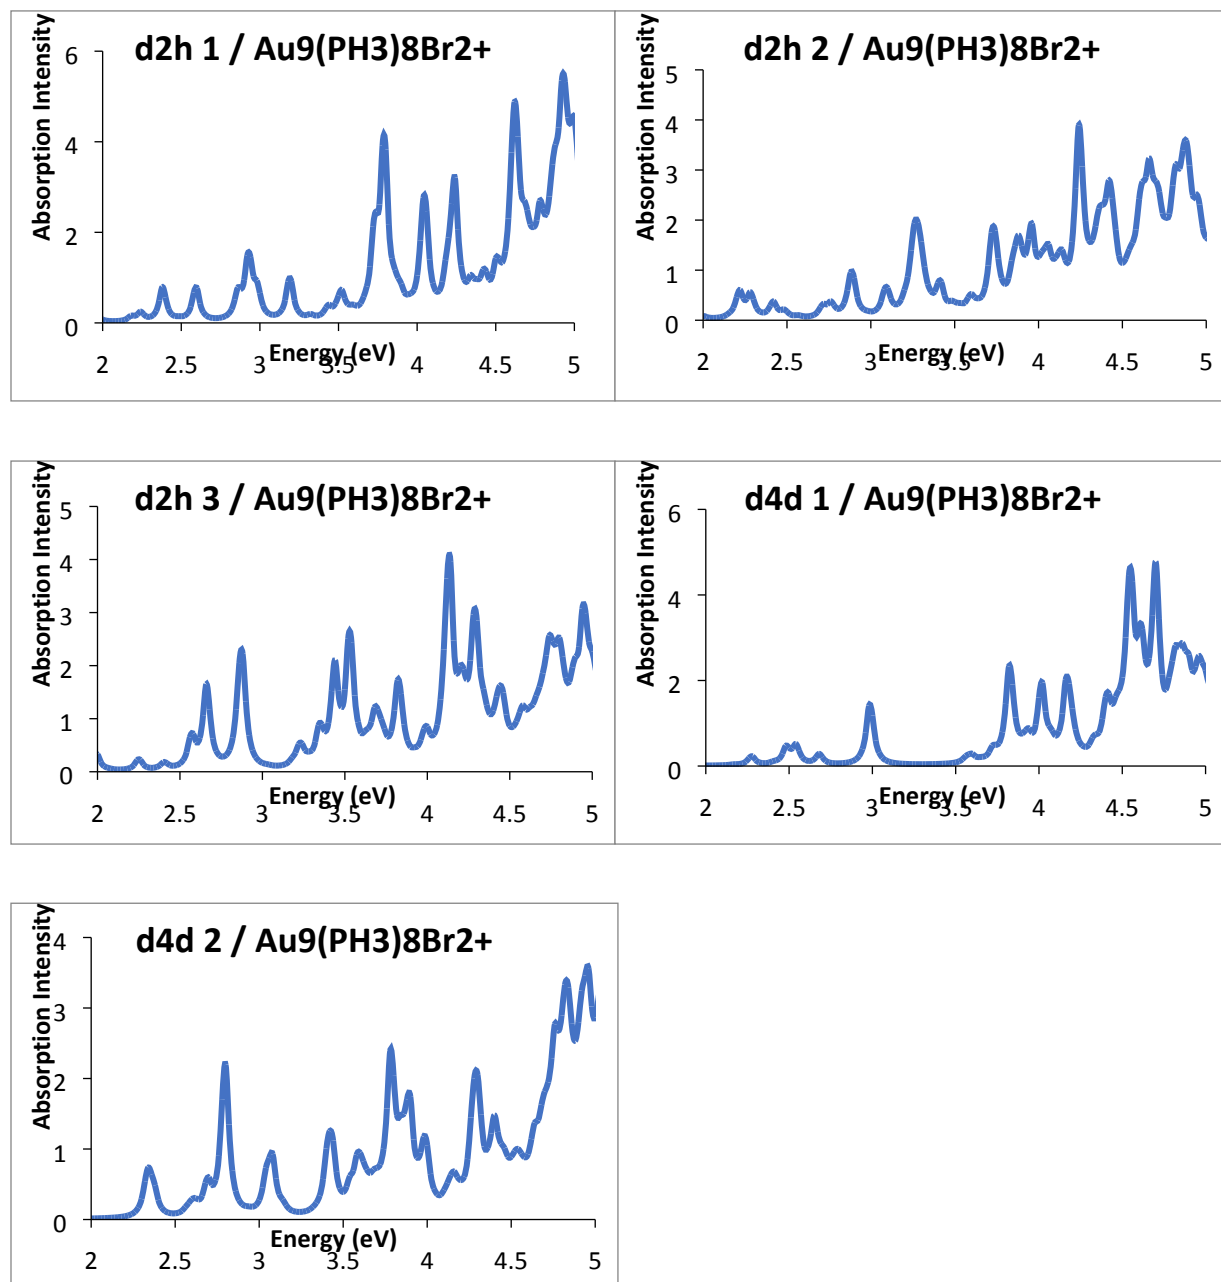

**Figure S12.** Absorption spectrums of bromide ligated structures.

**Table S15.** Excited states of Au<sub>9</sub>(PH<sub>3</sub>)<sub>8</sub>Br<sup>2+</sup> (D<sub>4d</sub> symmetry (**d4d 2**)). All excited states between 2.0 and 3.9 eV with oscillator strengths larger than 0.01 are listed.

| Energy (eV) | f      | Superatomic character (%) | Weight (%) | Transition |         |
|-------------|--------|---------------------------|------------|------------|---------|
| 2.34        | 0.0339 | 84.39                     | 62.73      | HOMO       | LUMO +1 |
|             |        |                           | 17.63      | HOMO -1    | LUMO    |
|             |        |                           | 11.06      | HOMO -2    | LUMO +1 |
| 2.69        | 0.0357 | 45.68                     | 42.88      | HOMO       | LUMO +2 |
|             |        |                           | 20.36      | HOMO -3    | LUMO    |
|             |        |                           | 15.00      | HOMO -4    | LUMO +1 |
| 2.79        | 0.1116 | 15.63                     | 12.61      | HOMO -2    | LUMO +2 |
|             |        |                           | 46.94      | HOMO -4    | LUMO    |
|             |        |                           | 25.97      | HOMO -2    | LUMO +1 |
| 3.08        | 0.0618 | 3.65                      | 91.20      | HOMO -4    | LUMO +2 |
| 3.41        | 0.0541 | 36.97                     | 51.81      | HOMO -5    | LUMO    |
|             |        |                           | 22.73      | HOMO       | LUMO +4 |
|             |        |                           | 12.13      | HOMO       | LUMO +5 |
| 3.43        | 0.0655 | 14.17                     | 71.71      | HOMO -5    | LUMO +1 |
|             |        |                           | 8.89       | HOMO -2    | LUMO +3 |
| 3.54        | 0.0044 | 5.32                      | 90.80      | HOMO -1    | LUMO +5 |
| 3.58        | 0.0362 | 48.84                     | 47.42      | HOMO       | LUMO +5 |
|             |        |                           | 25.76      | HOMO -5    | LUMO +2 |
|             |        |                           | 14.99      | HOMO -2    | LUMO +4 |
| 3.78        | 0.159  | 22.96                     | 37.43      | HOMO -5    | LUMO +2 |
|             |        |                           | 19.04      | HOMO       | LUMO +5 |
|             |        |                           | 9.21       | HOMO -8    | LUMO +1 |

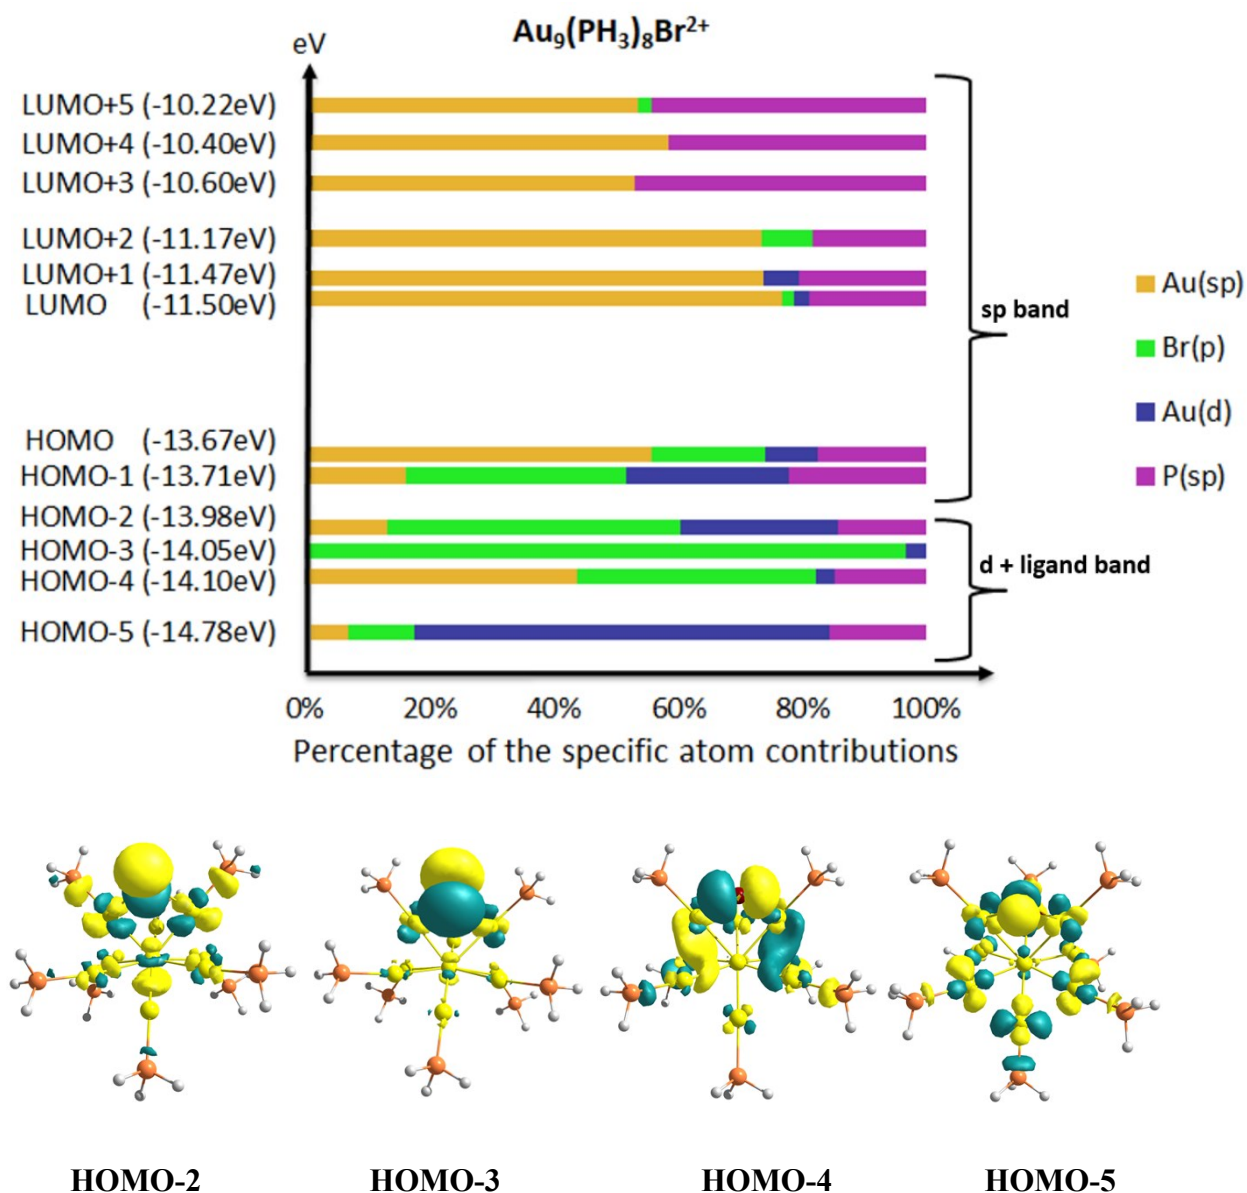

**Figure S13.** Kohn–Sham orbital energy level diagram for the Au<sub>9</sub>(PH<sub>3</sub>)<sub>8</sub>Br<sup>2+</sup> structure. Each KS orbital is drawn to indicate the relative contributions (line length with color labels) of the atomic orbitals of Au (sp) in gold, Br(s) in green, Au (d) in blue, and P (sp) in purple. The y axis shows the M.O. and energy level. X axis shows the percentage of the specific atom contributions. HOMO-2, HOMO-3, HOMO-4 and HOMO-5 orbital depictions were given. HOMO and HOMO-1 were given in the MS.

**Au<sub>9</sub>(PPh<sub>3</sub>)<sub>8</sub>Br<sup>2+</sup>****Table S16.** Excited states of Au<sub>9</sub>(PPh<sub>3</sub>)<sub>8</sub>Br<sup>2+</sup>. All excited states with oscillator strengths larger than 0.02 are listed.

| Energy (eV) | f      | Superatomic character (%) | Weight (%) | Transition |         |
|-------------|--------|---------------------------|------------|------------|---------|
| 1.94        | 0.0517 | 99.49                     | 0.9531     | HOMO       | LUMO    |
| 2.21        | 0.0477 | 82.85                     | 0.6099     | HOMO-1     | LUMO    |
|             |        |                           | 0.1327     | HOMO-2     | LUMO    |
| 2.39        | 0.0267 | 19.26                     | 0.5531     | HOMO-2     | LUMO+1  |
|             |        |                           | 0.228      | HOMO-3     | LUMO    |
| 2.57        | 0.0336 | 17.94                     | 0.5844     | HOMO-4     | LUMO    |
|             |        |                           | 0.1723     | HOMO-3     | LUMO+2  |
| 2.63        | 0.0237 | 97.85                     | 0.7793     | HOMO       | LUMO+15 |
|             |        |                           | 0.1051     | HOMO       | LUMO+16 |
| 2.69        | 0.0408 | 96.99                     | 0.7544     | HOMO       | LUMO+17 |
| 2.69        | 0.0231 | 44.74                     | 0.3458     | HOMO-4     | LUMO+1  |
|             |        |                           | 0.3167     | HOMO-1     | LUMO+8  |
| 2.82        | 0.0265 | 80.29                     | 0.5782     | HOMO-1     | LUMO+12 |
| 2.95        | 0.0454 | 35.24                     | 0.2388     | HOMO-4     | LUMO+5  |
|             |        |                           | 0.215      | HOMO-5     | LUMO    |
|             |        |                           | 0.1589     | HOMO-1     | LUMO+18 |
|             |        |                           | 0.1231     | HOMO-2     | LUMO+13 |
| 2.96        | 0.0379 | 17.34                     | 0.6301     | HOMO-4     | LUMO+5  |
|             |        |                           | 0.1236     | HOMO-5     | LUMO    |
| 3.00        | 0.0347 | 57.7                      | 0.4731     | HOMO-1     | LUMO+21 |
|             |        |                           | 0.2345     | HOMO-2     | LUMO+15 |
| 3.01        | 0.0204 | 16.79                     | 0.6738     | HOMO-3     | LUMO+10 |

## Cartesian Coordinates of the Most Stable Structures

### $\text{Au}_9(\text{PH}_3)_8^{3+}$ ( $D_{2h}$ symmetry)

|    |              |              |              |
|----|--------------|--------------|--------------|
| Au | 0.000000000  | 0.000000000  | 0.000000000  |
| Au | -2.390600000 | 0.000000000  | 1.389600000  |
| Au | 2.390600000  | 0.000000000  | 1.389600000  |
| Au | 2.390600000  | 0.000000000  | -1.389600000 |
| Au | -2.390600000 | 0.000000000  | -1.389600000 |
| Au | -1.420800000 | 2.381800000  | 0.000000000  |
| Au | -1.420800000 | -2.381800000 | 0.000000000  |
| Au | 1.420800000  | -2.381800000 | 0.000000000  |
| Au | 1.420800000  | 2.381800000  | 0.000000000  |
| P  | -3.661800000 | 0.000000000  | 3.435500000  |
| P  | 3.661800000  | 0.000000000  | 3.435500000  |
| P  | 3.661800000  | 0.000000000  | -3.435500000 |
| P  | -3.661800000 | 0.000000000  | -3.435500000 |
| P  | -2.667500000 | 4.505800000  | 0.000000000  |
| P  | -2.667500000 | -4.505800000 | 0.000000000  |
| P  | 2.667500000  | -4.505800000 | 0.000000000  |
| P  | 2.667500000  | 4.505800000  | 0.000000000  |
| H  | -1.918100000 | -5.712600000 | 0.000000000  |
| H  | -3.542800000 | -4.754600000 | 1.091000000  |
| H  | -3.542800000 | -4.754600000 | -1.091000000 |
| H  | 3.542800000  | 4.754600000  | 1.091000000  |
| H  | 3.542800000  | 4.754600000  | -1.091000000 |
| H  | 1.918100000  | 5.712600000  | 0.000000000  |
| H  | 3.542800000  | -4.754600000 | 1.091000000  |
| H  | 1.918100000  | -5.712600000 | 0.000000000  |
| H  | 3.542800000  | -4.754600000 | -1.091000000 |
| H  | -3.542800000 | 4.754600000  | -1.091000000 |
| H  | -3.542800000 | 4.754600000  | 1.091000000  |
| H  | -1.918100000 | 5.712600000  | 0.000000000  |
| H  | 5.070700000  | 0.000000000  | 3.275400000  |
| H  | 3.477600000  | 1.097600000  | 4.314000000  |
| H  | 3.477600000  | -1.097600000 | 4.314000000  |
| H  | -3.477600000 | 1.097600000  | -4.314000000 |
| H  | -3.477600000 | -1.097600000 | -4.314000000 |
| H  | -5.070700000 | 0.000000000  | -3.275400000 |
| H  | 3.477600000  | 1.097600000  | -4.314000000 |
| H  | 5.070700000  | 0.000000000  | -3.275400000 |
| H  | 3.477600000  | -1.097600000 | -4.314000000 |
| H  | -3.477600000 | -1.097600000 | 4.314000000  |
| H  | -3.477600000 | 1.097600000  | 4.314000000  |
| H  | -5.070700000 | 0.000000000  | 3.275400000  |

**Au<sub>9</sub>(PH<sub>3</sub>)<sub>8</sub><sup>3+</sup> (D<sub>4d</sub> symmetry)**

|    |              |              |              |
|----|--------------|--------------|--------------|
| Au | 0.000000000  | 0.000000000  | 0.000000000  |
| Au | 2.330600000  | 0.965400000  | -1.035400000 |
| Au | -2.330600000 | -0.965400000 | -1.035400000 |
| Au | -0.965400000 | 2.330600000  | -1.035400000 |
| Au | 0.965400000  | -2.330600000 | -1.035400000 |
| Au | -2.330600000 | 0.965400000  | 1.035400000  |
| Au | 2.330600000  | -0.965400000 | 1.035400000  |
| Au | 0.965400000  | 2.330600000  | 1.035400000  |
| Au | -0.965400000 | -2.330600000 | 1.035400000  |
| P  | 3.975800000  | 1.646800000  | -2.637100000 |
| P  | -3.975800000 | -1.646800000 | -2.637100000 |
| P  | -1.646800000 | 3.975800000  | -2.637100000 |
| P  | 1.646800000  | -3.975800000 | -2.637100000 |
| P  | -3.975800000 | 1.646800000  | 2.637100000  |
| P  | 3.975800000  | -1.646800000 | 2.637100000  |
| P  | 1.646800000  | 3.975800000  | 2.637100000  |
| P  | -1.646800000 | -3.975800000 | 2.637100000  |
| H  | -4.384000000 | -2.985800000 | -2.594900000 |
| H  | -5.211200000 | -0.988600000 | -2.594900000 |
| H  | -3.645500000 | -1.510000000 | -3.991100000 |
| H  | 3.645500000  | 1.510000000  | -3.991100000 |
| H  | 4.384000000  | 2.985800000  | -2.594900000 |
| H  | 5.211200000  | 0.988600000  | -2.594900000 |
| H  | 2.985800000  | -4.384000000 | -2.594900000 |
| H  | 0.988600000  | -5.211200000 | -2.594900000 |
| H  | 1.510000000  | -3.645500000 | -3.991100000 |
| H  | -1.510000000 | 3.645500000  | -3.991100000 |
| H  | -2.985800000 | 4.384000000  | -2.594900000 |
| H  | -0.988600000 | 5.211200000  | -2.594900000 |
| H  | 4.384000000  | -2.985800000 | 2.594900000  |
| H  | 5.211200000  | -0.988600000 | 2.594900000  |
| H  | 3.645500000  | -1.510000000 | 3.991100000  |
| H  | -3.645500000 | 1.510000000  | 3.991100000  |
| H  | -4.384000000 | 2.985800000  | 2.594900000  |
| H  | -5.211200000 | 0.988600000  | 2.594900000  |
| H  | -2.985800000 | -4.384000000 | 2.594900000  |
| H  | -0.988600000 | -5.211200000 | 2.594900000  |
| H  | -1.510000000 | -3.645500000 | 3.991100000  |
| H  | 1.510000000  | 3.645500000  | 3.991100000  |
| H  | 2.985800000  | 4.384000000  | 2.594900000  |
| H  | 0.988600000  | 5.211200000  | 2.594900000  |

**Au<sub>9</sub>(PH<sub>3</sub>)<sub>8</sub>H<sup>2+</sup> (D<sub>2h</sub> symmetry (d2h 2))**

|    |              |              |              |
|----|--------------|--------------|--------------|
| Au | -0.020900000 | 0.052600000  | -1.036800000 |
| Au | -1.343400000 | 0.716900000  | 1.226400000  |
| Au | 1.336100000  | -0.636200000 | 1.195400000  |
| Au | 2.633300000  | 0.349700000  | -1.269600000 |
| Au | -2.677500000 | -0.266300000 | -1.206500000 |
| Au | -1.338700000 | 2.373300000  | -1.271700000 |
| Au | -1.088200000 | -2.104600000 | 0.390100000  |
| Au | 1.273800000  | -2.274600000 | -1.317000000 |
| Au | 1.065200000  | 2.186300000  | 0.392300000  |
| P  | -2.642300000 | 1.226900000  | 3.119100000  |
| P  | 2.606800000  | -1.213600000 | 3.095300000  |
| P  | 4.832600000  | 0.702300000  | -1.964300000 |
| P  | -4.852000000 | -0.735800000 | -1.925900000 |
| P  | -2.316800000 | 4.345300000  | -2.070500000 |
| P  | -2.015400000 | -4.104100000 | 1.309500000  |
| P  | 2.241500000  | -4.236300000 | -2.159600000 |
| P  | 2.030600000  | 4.203500000  | 1.211400000  |
| H  | -1.131000000 | -5.158700000 | 1.610200000  |
| H  | -2.727200000 | -4.054000000 | 2.524400000  |
| H  | -2.950100000 | -4.812800000 | 0.529500000  |
| H  | 2.678800000  | 4.218300000  | 2.462100000  |
| H  | 3.035300000  | 4.804100000  | 0.427700000  |
| H  | 1.186200000  | 5.318600000  | 1.380600000  |
| H  | 3.433600000  | -4.709300000 | -1.578100000 |
| H  | 1.481000000  | -5.420500000 | -2.144600000 |
| H  | 2.625000000  | -4.214000000 | -3.513800000 |
| H  | -2.745500000 | 4.309300000  | -3.410700000 |
| H  | -3.480400000 | 4.848500000  | -1.458000000 |
| H  | -1.536200000 | 5.515900000  | -2.102700000 |
| H  | 3.998000000  | -1.005700000 | 3.027600000  |
| H  | 2.337300000  | -0.556400000 | 4.311400000  |
| H  | 2.596700000  | -2.547100000 | 3.547700000  |
| H  | -5.218000000 | -0.265300000 | -3.201100000 |
| H  | -5.193900000 | -2.093800000 | -2.070300000 |
| H  | -5.957500000 | -0.288700000 | -1.177400000 |
| H  | 5.450300000  | 1.920100000  | -1.621500000 |
| H  | 5.835400000  | -0.196000000 | -1.552700000 |
| H  | 5.063300000  | 0.702900000  | -3.352800000 |
| H  | -2.434000000 | 0.499000000  | 4.306100000  |
| H  | -2.616500000 | 2.534500000  | 3.642200000  |
| H  | -4.034500000 | 1.061500000  | 2.988600000  |
| H  | -0.040800000 | 0.049600000  | -2.659100000 |



**Au<sub>9</sub>(PH<sub>3</sub>)<sub>8</sub>F<sup>2+</sup> (D<sub>4d</sub> symmetry (d4d 2))**

|    |              |              |              |
|----|--------------|--------------|--------------|
| Au | 0.196700000  | -0.356700000 | -0.220600000 |
| Au | 1.936700000  | 1.378600000  | -1.565400000 |
| Au | -2.425900000 | -0.257100000 | -1.389500000 |
| Au | -0.794600000 | 2.137100000  | -0.985100000 |
| Au | 1.197800000  | -2.847700000 | 0.171600000  |
| Au | -1.977500000 | 0.630200000  | 1.122200000  |
| Au | 2.835300000  | -0.533400000 | 0.366400000  |
| Au | 1.203300000  | 1.828900000  | 1.045800000  |
| Au | -1.562500000 | -2.229600000 | 0.585900000  |
| P  | 2.892500000  | 1.847400000  | -3.661100000 |
| P  | -3.461600000 | -0.709400000 | -3.450100000 |
| P  | -1.516000000 | 4.269200000  | -1.729300000 |
| P  | 2.275100000  | -4.969000000 | 0.322300000  |
| P  | -3.837600000 | 1.218700000  | 2.518600000  |
| P  | 5.087700000  | -0.515400000 | 1.027900000  |
| P  | 1.450500000  | 2.920800000  | 3.102700000  |
| P  | -3.086400000 | -3.687800000 | 1.625300000  |
| H  | -4.165500000 | -1.920200000 | -3.580000000 |
| H  | -4.445400000 | 0.193400000  | -3.892800000 |
| H  | -2.651600000 | -0.771800000 | -4.598600000 |
| H  | 2.036500000  | 1.878800000  | -4.776900000 |
| H  | 3.551000000  | 3.080200000  | -3.820300000 |
| H  | 3.885800000  | 0.973800000  | -4.139800000 |
| H  | 3.384900000  | -5.052500000 | 1.183400000  |
| H  | 1.541200000  | -6.080200000 | 0.779200000  |
| H  | 2.837100000  | -5.517500000 | -0.845700000 |
| H  | -1.534600000 | 4.544500000  | -3.109300000 |
| H  | -2.813400000 | 4.690500000  | -1.384200000 |
| H  | -0.773500000 | 5.373600000  | -1.273100000 |
| H  | 5.863300000  | -1.678400000 | 0.863300000  |
| H  | 5.937300000  | 0.425700000  | 0.418200000  |
| H  | 5.348900000  | -0.239700000 | 2.382100000  |
| H  | -3.589600000 | 0.989100000  | 3.883500000  |
| H  | -4.222400000 | 2.571400000  | 2.570700000  |
| H  | -5.108300000 | 0.624600000  | 2.394800000  |
| H  | -4.413900000 | -3.730200000 | 1.161200000  |
| H  | -2.795700000 | -5.064300000 | 1.658800000  |
| H  | -3.308200000 | -3.451100000 | 2.993700000  |
| H  | 1.557000000  | 2.040200000  | 4.187700000  |
| H  | 2.540700000  | 3.780000000  | 3.350000000  |
| H  | 0.381000000  | 3.734800000  | 3.498400000  |
| F  | -0.615000000 | 1.281000000  | 2.774900000  |

**Au<sub>9</sub>(PH<sub>3</sub>)<sub>8</sub>Cl<sup>2+</sup> (D<sub>4d</sub> symmetry (d4d 2))**

|    |              |              |              |
|----|--------------|--------------|--------------|
| Au | 0.135000000  | -0.395500000 | 0.017100000  |
| Au | 1.862900000  | 1.431400000  | -1.326000000 |
| Au | -2.433500000 | -0.281700000 | -1.274700000 |
| Au | -0.893100000 | 2.089500000  | -0.641400000 |
| Au | 1.180700000  | -2.891500000 | 0.214500000  |
| Au | -2.127900000 | 0.392100000  | 1.356200000  |
| Au | 2.791000000  | -0.577400000 | 0.514700000  |
| Au | 1.211100000  | 1.787100000  | 1.310800000  |
| Au | -1.609900000 | -2.401500000 | 0.497500000  |
| P  | 2.900400000  | 1.801800000  | -3.451400000 |
| P  | -3.481500000 | -0.632200000 | -3.406900000 |
| P  | -1.776100000 | 4.225400000  | -1.336600000 |
| P  | 2.255300000  | -5.067600000 | 0.213400000  |
| P  | -4.056800000 | 1.004800000  | 2.686100000  |
| P  | 5.060600000  | -0.610900000 | 1.291400000  |
| P  | 2.169400000  | 3.615400000  | 2.576500000  |
| P  | -3.203600000 | -4.029000000 | 1.258700000  |
| H  | -4.210800000 | -1.813500000 | -3.590000000 |
| H  | -4.436100000 | 0.299500000  | -3.836600000 |
| H  | -2.665400000 | -0.675600000 | -4.544100000 |
| H  | 2.104600000  | 1.787800000  | -4.604300000 |
| H  | 3.573600000  | 3.014700000  | -3.644900000 |
| H  | 3.904100000  | 0.908100000  | -3.845500000 |
| H  | 3.081400000  | -5.385400000 | 1.299900000  |
| H  | 1.462700000  | -6.223600000 | 0.188400000  |
| H  | 3.128800000  | -5.369700000 | -0.839900000 |
| H  | -1.633500000 | 4.608000000  | -2.676700000 |
| H  | -3.145700000 | 4.474100000  | -1.172300000 |
| H  | -1.265400000 | 5.373900000  | -0.716200000 |
| H  | 5.672200000  | -1.850000000 | 1.523400000  |
| H  | 6.049600000  | -0.005600000 | 0.505200000  |
| H  | 5.319800000  | 0.009400000  | 2.520200000  |
| H  | -3.960400000 | 0.733600000  | 4.056500000  |
| H  | -4.395400000 | 2.362900000  | 2.743500000  |
| H  | -5.326000000 | 0.468400000  | 2.428600000  |
| H  | -4.406400000 | -4.172600000 | 0.554300000  |
| H  | -2.814100000 | -5.372600000 | 1.331300000  |
| H  | -3.708300000 | -3.861300000 | 2.554900000  |
| H  | 2.763200000  | 3.275600000  | 3.799000000  |
| H  | 3.173100000  | 4.442400000  | 2.054200000  |
| H  | 1.274300000  | 4.594400000  | 3.025700000  |
| Cl | -0.326200000 | 0.852800000  | 3.272600000  |

**Au<sub>9</sub>(PH<sub>3</sub>)<sub>8</sub>Br<sup>2+</sup> (D<sub>4d</sub> symmetry (d4d 2))**

|    |              |              |              |
|----|--------------|--------------|--------------|
| Au | 0.141500000  | -0.286200000 | 0.073400000  |
| Au | 1.941400000  | 1.428700000  | -1.294000000 |
| Au | -2.348200000 | -0.338200000 | -1.287400000 |
| Au | -0.870800000 | 2.140800000  | -0.754300000 |
| Au | 1.173000000  | -2.784300000 | 0.160500000  |
| Au | -2.177200000 | 0.569300000  | 1.296500000  |
| Au | 2.752100000  | -0.474500000 | 0.736200000  |
| Au | 1.182100000  | 1.964800000  | 1.279500000  |
| Au | -1.567200000 | -2.276200000 | 0.714300000  |
| P  | 3.020300000  | 1.766900000  | -3.405400000 |
| P  | -3.374300000 | -0.906900000 | -3.375400000 |
| P  | -1.746900000 | 4.212500000  | -1.633600000 |
| P  | 2.054100000  | -5.020900000 | -0.101000000 |
| P  | -4.232400000 | 1.195800000  | 2.414800000  |
| P  | 4.928600000  | -0.695100000 | 1.718200000  |
| P  | 2.195000000  | 3.902300000  | 2.331500000  |
| P  | -3.079600000 | -3.897400000 | 1.627400000  |
| H  | -3.202400000 | -2.203900000 | -3.875800000 |
| H  | -4.768900000 | -0.801300000 | -3.461200000 |
| H  | -3.019500000 | -0.168100000 | -4.512400000 |
| H  | 2.227900000  | 1.742900000  | -4.560600000 |
| H  | 3.697300000  | 2.975500000  | -3.618600000 |
| H  | 4.021900000  | 0.865800000  | -3.787500000 |
| H  | 3.431100000  | -5.229400000 | 0.061000000  |
| H  | 1.567600000  | -6.045800000 | 0.721600000  |
| H  | 1.884100000  | -5.630600000 | -1.352000000 |
| H  | -2.014000000 | 4.305200000  | -3.006300000 |
| H  | -2.974400000 | 4.667700000  | -1.132200000 |
| H  | -0.994000000 | 5.384200000  | -1.472300000 |
| H  | 5.563800000  | -1.942000000 | 1.643200000  |
| H  | 5.975000000  | 0.122300000  | 1.267600000  |
| H  | 5.017300000  | -0.462400000 | 3.096200000  |
| H  | -4.569600000 | 0.449500000  | 3.551900000  |
| H  | -4.274700000 | 2.481900000  | 2.968800000  |
| H  | -5.471500000 | 1.185400000  | 1.758900000  |
| H  | -4.338900000 | -4.059700000 | 1.033200000  |
| H  | -2.668900000 | -5.236500000 | 1.666700000  |
| H  | -3.463600000 | -3.725100000 | 2.963100000  |
| H  | 2.755400000  | 3.702500000  | 3.600400000  |
| H  | 3.246600000  | 4.605600000  | 1.726400000  |
| H  | 1.344800000  | 4.976300000  | 2.626400000  |
| Br | -0.399800000 | 1.071400000  | 3.341500000  |
